# Supplementary material for: Relationship between a uterine fibroid diagnosis and the risk of adverse obstetrical outcomes: a cohort study
Source: PubMed Central journal article supplement — BMJ Open. 2020 Feb 17;10(2):e032104. doi: 10.1136/bmjopen-2019-032104 (PMC7044982; doi:10.1136/bmjopen-2019-032104), 2020-02-17
Supplement: bmjopen-2019-032104.draft_revisions.pdf [file bmjopen-2019-032104.draft_revisions.pdf]

# BMJ Open

BMJ Open is committed to open peer review. As part of this commitment we make the peer review history of every article we publish publicly available.

When an article is published we post the peer reviewers' comments and the authors' responses online. We also post the versions of the paper that were used during peer review. These are the versions that the peer review comments apply to.

The versions of the paper that follow are the versions that were submitted during the peer review process. They are not the versions of record or the final published versions. They should not be cited or distributed as the published version of this manuscript.

BMJ Open is an open access journal and the full, final, typeset and author-corrected version of record of the manuscript is available on our site with no access controls, subscription charges or pay-per-view fees (<http://bmjopen.bmj.com>).

If you have any questions on BMJ Open's open peer review process please email [info.bmjopen@bmj.com](mailto:info.bmjopen@bmj.com)

# BMJ Open

## The relationship between a uterine fibroid diagnosis and the risk of preterm birth, a cohort study.

|                               |                                                                                                                                                                                                                                                                                                                                                                                                                                                                                                                                                                                                                                                           |
|-------------------------------|-----------------------------------------------------------------------------------------------------------------------------------------------------------------------------------------------------------------------------------------------------------------------------------------------------------------------------------------------------------------------------------------------------------------------------------------------------------------------------------------------------------------------------------------------------------------------------------------------------------------------------------------------------------|
| Journal:                      | <i>BMJ Open</i>                                                                                                                                                                                                                                                                                                                                                                                                                                                                                                                                                                                                                                           |
| Manuscript ID                 | bmjopen-2019-032104                                                                                                                                                                                                                                                                                                                                                                                                                                                                                                                                                                                                                                       |
| Article Type:                 | Research                                                                                                                                                                                                                                                                                                                                                                                                                                                                                                                                                                                                                                                  |
| Date Submitted by the Author: | 03-Jun-2019                                                                                                                                                                                                                                                                                                                                                                                                                                                                                                                                                                                                                                               |
| Complete List of Authors:     | <p>karlsen, kamilla; University of Southern Denmark, Gynecology and Obstetrics<br/>         Schiøler Kesmodel, Ulrik; Institute of Clinical Research, University of Southern Denmark, Research Unit of Gynecology; Aalborg Universitet, Department of Clinical Medicine<br/>         Mogensen, Ole; Aarhus University Hospital and Faculty of Health, Aarhus University, Aarhus, Denmark<br/>         Humaidan, Peter; The Fertility Clinic, Skive Regional Hospital; Aarhus Universitet, Faculty of Health<br/>         Ravn, Pernille; Syddansk Universitet, Clinical Institut; Odense University Hospital, Department of Gynecology and Obstetrics</p> |
| Keywords:                     | Uterine fibroids, Preterm birth, Obstetrical complications                                                                                                                                                                                                                                                                                                                                                                                                                                                                                                                                                                                                |
|                               |                                                                                                                                                                                                                                                                                                                                                                                                                                                                                                                                                                                                                                                           |

SCHOLARONE™  
Manuscripts

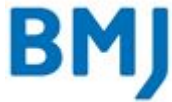

I, the Submitting Author has the right to grant and does grant on behalf of all authors of the Work (as defined in the below author licence), an exclusive licence and/or a non-exclusive licence for contributions from authors who are: i) UK Crown employees; ii) where BMJ has agreed a CC-BY licence shall apply, and/or iii) in accordance with the terms applicable for US Federal Government officers or employees acting as part of their official duties; on a worldwide, perpetual, irrevocable, royalty-free basis to BMJ Publishing Group Ltd ("BMJ") its licensees and where the relevant Journal is co-owned by BMJ to the co-owners of the Journal, to publish the Work in this journal and any other BMJ products and to exploit all rights, as set out in our [licence](#).

The Submitting Author accepts and understands that any supply made under these terms is made by BMJ to the Submitting Author unless you are acting as an employee on behalf of your employer or a postgraduate student of an affiliated institution which is paying any applicable article publishing charge ("APC") for Open Access articles. Where the Submitting Author wishes to make the Work available on an Open Access basis (and intends to pay the relevant APC), the terms of reuse of such Open Access shall be governed by a Creative Commons licence – details of these licences and which [Creative Commons](#) licence will apply to this Work are set out in our licence referred to above.

Other than as permitted in any relevant BMJ Author's Self Archiving Policies, I confirm this Work has not been accepted for publication elsewhere, is not being considered for publication elsewhere and does not duplicate material already published. I confirm all authors consent to publication of this Work and authorise the granting of this licence.

1  
2  
3  
4 **Title page**  
5

6  
7 **Title**

8  
9 The relationship between a uterine fibroid diagnosis and the risk of preterm birth, a cohort study.  
10

11 **Running title**

12  
13 Uterine fibroids and preterm birth  
14

15 **Corresponding Author**

16  
17 K. Karlsen, MD, PhD student, University of Southern Denmark, Department of Gynecology and Obstetrics,  
18 Odense University Hospital, Klørvænget 10, 10<sup>th</sup> floor, 5000 Odense C, Denmark, [Kamilla.karlsen@rsyd.dk](mailto:Kamilla.karlsen@rsyd.dk)  
19

20  
21 **Co-authors**

22  
23 U.S. Kesmodel, Professor, MD, PhD, Aalborg University Hospital, Aalborg, and Department of Clinical  
24 Medicine, Aalborg University, Denmark  
25

26  
27 O. Mogensen, Professor, MD, DMSc, Aarhus University Hospital and Faculty of Health, Aarhus University,  
28 Aarhus, Denmark  
29

30  
31 P. Humaidan, Professor, MD, DMSc, The Fertility Clinic, Skive Regional Hospital, Skive, and Faculty of Health,  
32 Aarhus University, Aarhus, Denmark  
33

34  
35 P. Ravn, Associate professor, MD, DMSc, Department of Gynecology and Obstetrics, Odense University  
36 Hospital, Klørvænget 10, 10<sup>th</sup> floor, 5000 Odense C, Denmark  
37

38  
39 **Word count:** 3.159 words  
40

41  
42 **Key words:** Uterine fibroids, Preterm birth  
43  
44  
45  
46  
47  
48  
49  
50  
51  
52  
53  
54  
55  
56  
57  
58  
59  
60

1  
2  
3  
4  
5  
6  
7  
8  
9  
10  
11  
12  
13  
14  
15  
16  
17  
18  
19  
20  
21  
22  
23  
24  
25  
26  
27  
28  
29  
30  
31  
32  
33  
34  
35  
36  
37  
38  
39  
40  
41  
42  
43  
44  
45  
46  
47  
48  
49  
50  
51  
52  
53  
54  
55  
56  
57  
58  
59  
60

## Abstract

**Objective:** The aim was to investigate the association between clinically significant uterine fibroids and preterm birth, caesarean section (CS), postpartum haemorrhage (PPH), placental abruption, intrauterine growth restriction (IUGR), and uterine rupture.

**Methods, participants, and setting:** A historical cohort study based on data from the Danish National Birth Cohort (DNBC), the Danish National Patient Registry (DNPR), and the Danish National Birth Registry (DNBR). The final study population consisted of 92,696 pregnancies and was divided into four groups for comparison. Group 1: pregnancies of women without a fibroid diagnosis code or fibroid operation code; Group 2: pregnancies of women with a fibroid diagnosis code before pregnancy, during pregnancy, or up to one year after delivery, and no fibroid operation code before pregnancy; Group 3: pregnancies of women with a fibroid diagnosis code given more than one year after delivery; and Group 4: pregnancies of women with a fibroid operation code given before pregnancy.

**Results:** A diagnosis of fibroids before pregnancy gives an increased risk of preterm birth  $\leq$  gestational age (GA) of 37 weeks (OR 2.3 (1.30–3.96)) and extreme preterm birth (GA 22+0–27+6 weeks, OR 20.1 (8.04–50.22)). The risk of CS was increased (OR 1.8 (1.23–2.72)) for women with a fibroid diagnosis code given before pregnancy; i.e., increased risk of elective CS (OR 1.9 (1.11–3.32)), but not acute CS (OR 1.5 (0.94–2.52)). The risks of PPH, placental abruption or IUGR were not increased in any of the groups.

**Conclusion:** We found a strong association between uterine fibroid diagnosis and preterm birth —extreme preterm birth in particular.

## Strengths and limitations of this study:

- This study explores an area with inconsistent evidence.
- This study is a large cohort study with data from 92,696 pregnancies.
- Limitations include a low prevalence of uterine fibroids and a small number of events.

## Introduction

As many as 10 % of pregnant women may have uterine fibroids [1], and the incidence is likely to be even higher in populations with high maternal age and obesity [2, 3]. Fibroids may affect the uterine cavity, the placenta, and the foetus directly, but may also cause the myometrium to be more inflexible and less responsive to oxytocin [4, 5]. Overall, fibroids are associated with obstetrical complication rates of 10–40 % [6, 7], many of which have severe consequences. Due to the clinical impact on the mother and child, outcomes such as preterm birth, caesarean section (CS), postpartum haemorrhage (PPH), placental abruption, intrauterine growth restriction (IUGR), and uterine rupture have been evaluated in relation to uterine fibroids [6-11]. Some studies showed an association between fibroids and preterm birth, CS, PPH, and placental abruption [8, 9, 12-14], whereas other studies showed no association with preterm birth, CS, PPH, and IUGR [7, 13, 15].

To address these discrepancies, we conducted a large historical cohort study of unselected pregnant women. We focused on women with clinically significant fibroids and compared women with a uterine fibroid diagnosis code to a reference group of women without a uterine fibroid diagnosis code. The aim was to investigate the association between clinically significant uterine fibroids and obstetrical outcomes with a specific focus on preterm birth, CS, PPH, placental abruption, IUGR, and uterine rupture. Moreover, we analysed the association between myomectomy and the risk of uterine rupture.

1  
2  
3  
4  
5  
6  
7  
8  
9  
10  
11  
12  
13  
14  
15  
16  
17  
18  
19  
20  
21  
22  
23  
24  
25  
26  
27  
28  
29  
30  
31  
32  
33  
34  
35  
36  
37  
38  
39  
40  
41  
42  
43  
44  
45  
46  
47  
48  
49  
50  
51  
52  
53  
54  
55  
56  
57  
58  
59  
60

## Materials and methods

This historical cohort study is based on data from the Danish National Birth Cohort (DNBC), the Danish National Birth Registry (DNBR), and the Danish National Patient Registry (DNPR).

### Study population

The DNBC is a pregnancy cohort consisting of data from 92,840 women and 101,042 pregnancies. All registered pregnancies were included. Enrolment was performed in early pregnancy during the period between 1996–2002. Inclusion criteria were the intention to carry a pregnancy to term, residency in Denmark, and sufficient Danish proficiency to participate in telephone interviews. Data was collected by computer-assisted telephone interviews twice during pregnancy, and subsequently when the children were six and eighteen months old. The DNBC data collection was approved by the Danish National Ethics Board. More details about this cohort have previously been described in detail [16].

The DNPR holds diagnosis and operation codes from all in-patients since 1977 and out-patients since 1995. The codes are classified according to the International Classification of Diseases ICD10 since 1994. Diagnosis and operation codes regarding fibroids were collected for this study.

The DNBR contains information about live births and complications of all registered births in Denmark since 1973.

Selected relevant data from the DNPR and the DNBR was linked to data from the DNBC, using the unique personal identification number given to all residents in Denmark.

### Data

1  
2  
3  
4 We collected data on maternal age, height, weight, smoking habits, expected date of birth, fertility  
5 treatment, and time to pregnancy (TTP) from the DNBC. Maternal body mass index (BMI) (kg/m<sup>2</sup>) was  
6  
7  
8 calculated based on self-reported pre-pregnancy weight and height.  
9

10  
11 Fibroid diagnosis codes (DD25–DD259) and fibroid operation codes were collected from the DNPR.

12  
13 Operation codes were: myomectomy (KLCB10), laparoscopic myomectomy (KLCB11), hysteroscopic  
14  
15 myomectomy (KLCB20), hysteroscopic resection of pathological tissue (KLCB22), hysteroscopic excision of  
16  
17 pathological tissue (KLCB25), and hysteroscopic excision of other pathological tissue (KLCB98). We  
18  
19 categorised operation codes into laparoscopic or open myomectomy (KLCB10, KLCB11) and hysteroscopic  
20  
21 myomectomy (KLCB20, KLCB22, KLCB25, and KLCB98). Operation codes of the resection and excision of  
22  
23 pathological tissue were pooled into one group of myomectomy since we assumed that many use these  
24  
25 codes for hysteroscopic myomectomy.  
26  
27  
28

29  
30 Gestational age (GA), birth weight of the child, and data on obstetrical outcomes (caesarean section  
31  
32 (KMCA10A, KMCA10D, KMCA10E, and KMCA10B), placental abruption (DO450, DO451, DO452, DO453,  
33  
34 DO458, and DO459)), and PPH (DO720, DO721, DO721A, and DO721B) were collected from the DNBR.  
35  
36

### 37 38 Exposure definition

39  
40  
41 The study population was divided into four groups for comparison. Group 1: pregnancies of women without  
42  
43 a fibroid diagnosis code or operation code; Group 2: pregnancies of women with a fibroid diagnosis code  
44  
45 before pregnancy, during pregnancy, or up to one year after delivery, and no operation code before  
46  
47 pregnancy; Group 3: pregnancies of women with a fibroid diagnosis code given more than one year after  
48  
49 delivery; and Group 4: pregnancies of women with an operation code given before pregnancy.  
50  
51

### 52 53 Outcome definition

54  
55  
56 The outcomes were preterm birth, CS, placental abruption, PPH, IUGR and uterine rupture.  
57  
58  
59  
60



1  
2  
3  
4 Preterm birth was defined as delivery at GA 22+0–36+6 weeks. We divided preterm birth into three  
5  
6 categories according to the international classifications. Moderate preterm: GA 34+0–36+6 weeks, very  
7  
8 preterm: GA 28+0–33+6 weeks, and extreme preterm: GA 22+0–27+6 weeks. Due to the small number of  
9  
10 events, we merged the groups into clinically relevant binary outcomes: moderate preterm: GA 34+0–36+6  
11  
12 weeks and very and extreme preterm GA 22+0–33+6 weeks.  
13  
14

15  
16 CS was categorised as acute (KMCA10A, KMCA10D, and KMCA10E) or elective (KMCA10B).  
17

18  
19 Placental abruption was reported under several diagnosis codes (DO450, DO451, DO452, DO453, DO458,  
20  
21 and DO458) and pooled into one group.  
22  
23

24  
25 PPH was defined as bleeding during delivery and up to 24 hours postpartum (DO720, DO721, DO721A, and  
26  
27 DO721B).  
28  
29

30  
31 We followed the international classification of small of gestational age/IUGR as a birth weight below -22%  
32  
33 of the expected weight at a given GA. This classification was originally developed by the 1995 World Health  
34  
35 Organization (WHO) expert committee [17]. We used a lower limit of -60 % based on clinical reasoning; all  
36  
37 births with an expected birth weight below -60% were excluded due to potential misclassification.  
38  
39

40  
41 Data from the group of women who had a myomectomy before pregnancy was used to analyse the  
42  
43 association between myomectomy and the risk of uterine rupture (DO710, DO711).  
44

#### 45 Data purification

46  
47

48  
49 During the data purification, we made some assumptions. If a uterine fibroid diagnosis code was given  
50  
51 once, the woman was categorised as having at least one uterine fibroid during the study period, unless she  
52  
53 had a fibroid operation code. A fibroid diagnosis code given more than 90 days after a fibroid operation  
54  
55 code was interpreted as a new uterine fibroid. We assumed the fibroid to be present also before  
56  
57  
58  
59  
60

1  
2  
3  
4 pregnancy, if a fibroid diagnosis code was given during pregnancy or up to one year postpartum, and data  
5  
6 were included in the fibroid group.  
7

8  
9 Missing values were identified and analysed. We had an 87% complete dataset. Missing values were  
10  
11 imputed by multiple imputations of multiple variables (MICE) assuming that values were missing at  
12  
13 random. Analyses were made before and after imputation.  
14  
15

16  
17 We identified the potential confounders for each outcome based on the DAG (directed acyclic graph) [18].  
18  
19 For preterm birth, CS, and PPH, we identified maternal age and BMI to be possible confounders. For  
20  
21 placental abruption, we identified maternal age to be a possible confounder. For IUGR and uterine rupture,  
22  
23 we did not identify any possible confounders.  
24

25  
26  
27 We found that 317 women had a myomectomy before pregnancy (205 by hysteroscopy and 112 by  
28  
29 laparoscopy).  
30

### 31 32 Statistical analyses 33

34  
35 A one-way ANOVA was used for comparison of normally distributed data such as age. The Kruskal–Wallis  
36  
37 test was used for comparison of non-normally distributed data such as BMI and parity. Smoking habits and  
38  
39 fertility treatment were compared using the Chi–square test.  
40

41  
42  
43 We used logistic regression analysis to compare the binary outcomes; preterm birth, CS, PPH, placental  
44  
45 abruption, IUGR, and uterine rupture. We adjusted for potential confounders identified by DAGs in all  
46  
47 analyses. By using robust standard errors, we accounted for some women being included with more than  
48  
49 one pregnancy in the analyses.  
50

51  
52 We found the tests acceptable based on the Hosmer–Lemeshow goodness of fit test.  
53

54  
55 Subgroup analyses of women with a fibroid operation code before pregnancy were performed.  
56

57  
58 We performed stratified analyses for preterm birth regarding fertility treatment and multiple pregnancies.  
59  
60

1  
2  
3  
4 All analyses were performed in STATA 15.  
5  
6

7 Patient and Public involvement statement  
8  
9

10 Participant in the DNBC are involved in all research based on data from the DNBC. A member of the DNBC  
11  
12 ambassadors, which is a group of selected participants representing all participants, is represented in the  
13  
14 DNBC reference group. There was no other patient or public involvement in this study.  
15  
16

17  
18 Ethical approval  
19  
20

21 This study was approved by the Danish Data Protecting Agency (registration number; 2012-58-0018).  
22

23 According to Danish law, ethical approval is not required for registry-based studies.  
24  
25

26 Results  
27  
28

29  
30 Our final study population consisted of 86,323 women and 92,696 pregnancies, divided into the four  
31  
32 exposure groups. (Fig. I)  
33  
34  
35  
36  
37  
38  
39  
40  
41  
42  
43  
44  
45  
46  
47  
48  
49  
50  
51  
52  
53  
54  
55  
56  
57  
58  
59  
60

Figure 1: Flowchart of the study population

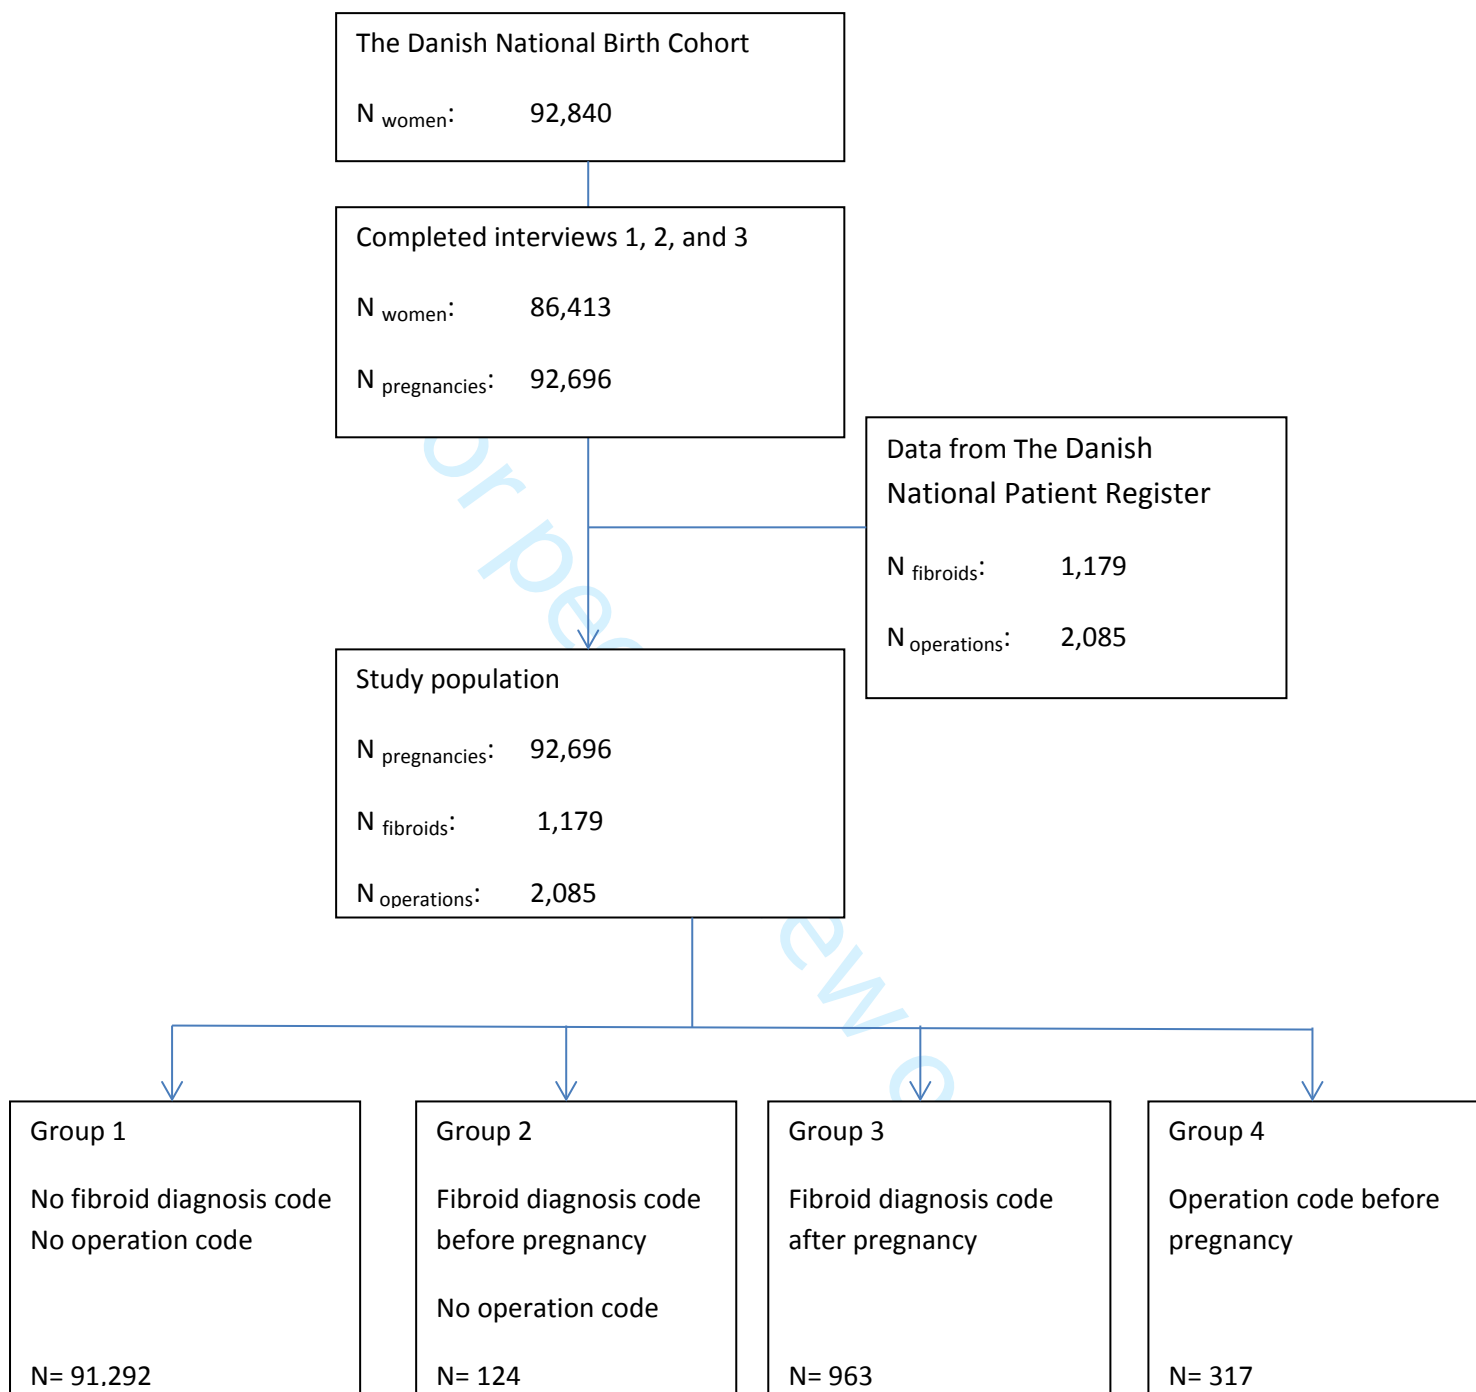

Population characteristics for the four exposure groups are shown in Table I. The groups did not differ regarding BMI, but they differed regarding age, smoking habits, parity, multiple pregnancies, and proportion of fertility treatment.

Table 1: Population characteristics

|                                                | No fibroids | Fibroids before pregnancy<br>No operation | Fibroids after pregnancy | Fibroid operation before pregnancy |
|------------------------------------------------|-------------|-------------------------------------------|--------------------------|------------------------------------|
| <b>Population, N</b>                           | 91,292      | 124                                       | 963                      | 317                                |
| <b>Age ,years<br/>Mean(SD)</b>                 | 30 (4.29)   | 34 (4.15)                                 | 32 (3.96)                | 34 (4.16)                          |
| <b>BMI, kg/m<sup>2</sup><br/>median(range)</b> | 23 (10-64)  | 23 (16-40)                                | 23 (16-49)               | 22 (18-35)                         |
| <b>Parity<br/>median (range)</b>               | 1 (0-14)    | 1 (0-3)                                   | 1 (0-5)                  | 0 (0-3)                            |
| <b>Smoking, %</b>                              | 16.43       | 11.82                                     | 16.04                    | 13.15                              |
| <b>Fertility treatment, %</b>                  | 6.32        | 18.48                                     | 9.76                     | 39.39                              |
| <b>Multiple pregnancy,%</b>                    | 2.14        | 4.03                                      | 3.95                     | 7.89                               |

1  
2  
3  
4 Preterm birth  
5  
6

7 The risk of overall preterm birth was increased among the group of women who had a fibroid diagnosis  
8 code before pregnancy compared to women without a fibroid diagnosis code, OR 2.3 (1.30–3.96). The risk  
9 of moderately preterm birth was not increased, OR 0.6 (0.20–1.96), whereas the risk of very preterm,  
10 extreme preterm, and the pooled group of very and extreme preterm birth, was significantly increased, OR  
11 4.00 (1.75–9.13), OR 20.1 (8.04–50.22), and OR 6.5 (3.51–12.19), respectively. For the group of women with  
12 a fibroid diagnosis code after pregnancy, the risk of preterm birth was not increased. The group of women  
13 who had an operation before pregnancy had an increased risk of overall preterm birth of OR 1.8  
14 (1.24–2.65) and very preterm birth OR 2.8 (1.55–5.22). None delivered extremely preterm (Table II).  
15  
16  
17  
18  
19  
20  
21  
22  
23  
24  
25  
26  
27  
28  
29  
30  
31  
32  
33  
34  
35  
36  
37  
38  
39  
40  
41  
42  
43  
44  
45  
46  
47  
48  
49  
50  
51  
52  
53  
54  
55  
56  
57  
58  
59  
60

Tabel 2 Results

|                              | No fibroids<br>(N=91,292) | Fibroids before pregnancy<br>No operation<br>(N=124) | Odds ratio (95%CI) | Fibroids after pregnancy<br>(N=963) | Odds ratio (95%CI) | Fibroid operation before pregnancy<br>(N=317) | Odds ratio (95%CI) |
|------------------------------|---------------------------|------------------------------------------------------|--------------------|-------------------------------------|--------------------|-----------------------------------------------|--------------------|
| <b>Preterm birth* (week)</b> |                           |                                                      |                    |                                     |                    |                                               |                    |
| ≤ 37                         | 4,939 (5.4%)              | 14 (11.3%)                                           | 2.27 (1.30-3.96)   | 55 (5.7%)                           | 1.08 (0.82-1.42)   | 29 (9.1%)                                     | 1.81 (1.24-2.65)   |
| ≥ 34 < 37                    | 3,506 (3.9%)              | 3 (2.4%)                                             | 0.62 (0.20-1.96)   | 41 (4.3%)                           | 1.11 (0.81-1.53)   | 18 (5.7%)                                     | 1.52 (0.94-2.43)   |
| ≥ 28 < 34                    | 1,159 (1.2%)              | 6 (4.8%)                                             | 3.99 (1.75-9.13)   | 11 (1.4%)                           | 0.90 (0.50-1.64)   | 11 (5.5%)                                     | 2.84 (1.55-5.22)   |
| ≥ 22 < 28                    | 176 (0.2%)                | 5 (4.0%)                                             | 20.09 (8.04-50.22) | 3 (0.3%)                            | 1.56 (0.50-4.89)   | 0 (0%)                                        | Empty              |
| ≥ 22 < 34                    | 1,335 (1.5%)              | 11 (8.9%)                                            | 6.54 (3.51-12.19)  | 14 (1.5%)                           | 0.99 (0.58-1.69)   | 11 (3.5%)                                     | 2.44 (1.33-4.48)   |
| <b>Caesarean section*</b>    |                           |                                                      |                    |                                     |                    |                                               |                    |
| Overall                      | 14,542 (16%)              | 36 (29%)                                             | 1.83 (1.23-2.72)   | 164 (17%)                           | 0.99 (0.84-1.19)   | 110 (35%)                                     | 2.48 (1.94-3.16)   |
| Acute                        | 9,901 (11%)               | 21 (17%)                                             | 1.54 (0.94-2.52)   | 116 (12%)                           | 1.08 (0.88-1.32)   | 62 (20%)                                      | 1.91 (1.44-2.52)   |
| Planned                      | 4,641 (5%)                | 15 (12%)                                             | 1.92 (1.11-3.32)   | 48 (5%)                             | 0.85 (0.64-1.14)   | 48 (15%)                                      | 2.58 (1.85-3.60)   |
| <b>IUGR*</b>                 | 3,731 (4.1%)              | 6 (4.8%)                                             | 1.27 (0.57-2.85)   | 35 (3.6%)                           | 0.91 (0.65-1.28)   | 13 (4.1%)                                     | 1.05 (0.60-1.83)   |
| <b>PPH*</b>                  | 3,364 (3.7%)              | 7 (5.7%)                                             | 1.70 (0.70-3.65)   | 36 (3.7%)                           | 1.06 (0.76-1.47)   | 15 (4.7%)                                     | 1.40 (0.84-2.35)   |
| <b>Abruption placentae**</b> | 490 (0.5%)                | 1 (0.8%)                                             | 1.41 (0.20-10.15)  | 6 (0.6%)                            | 1.13 (0.50-2.53)   | 3 (0.9%)                                      | 1.66 (0.53-5.21)   |
| <b>Uterus rupture</b>        | 7 (0.1%)                  | 0 (0%)                                               | Empty              | 2 (0.2%)                            | 2.84 (0.39-20.56)  | 0 (0%)                                        | Empty              |

\* adjusted for age and BMI

\*\* adjusted for age

1  
2  
3  
4 We stratified accordingly to fertility treatment and found an increased risk of extremely preterm birth (OR  
5  
6 25.6 (7.95–82.43)) among women treated for infertility and among spontaneously pregnant women (OR 8.4  
7  
8 (1.08–15.76)). The same was applicable for the pooled group of very and extreme preterm birth where  
9  
10 increased risk was found for women with fertility treatment OR 5.6 (2.24–13.85) and spontaneous  
11  
12 pregnancy OR 4.5 (1.28–15.76). In women with a fibroid diagnosis code before pregnancy, the risk of  
13  
14 preterm birth was not increased in any other groups (Table III).  
15  
16  
17  
18  
19  
20  
21  
22  
23  
24  
25  
26  
27  
28  
29  
30  
31  
32  
33  
34  
35  
36  
37  
38  
39  
40  
41  
42  
43  
44  
45  
46  
47  
48  
49  
50  
51  
52  
53  
54  
55  
56  
57  
58  
59  
60

For peer review only



Table 3: Results, stratified analyses, OR

|                                | Fibroids before pregnancy<br>No operation |                                 | Fibroids after pregnancy           |                                 | Operation before pregnancy         |                                 |
|--------------------------------|-------------------------------------------|---------------------------------|------------------------------------|---------------------------------|------------------------------------|---------------------------------|
|                                | Odds ratio(95%CI)                         | Odds ratio(95%CI)               | Odds ratio(95%CI)                  | Odds ratio(95%CI)               | Odds ratio(95%CI)                  | Odds ratio(95%CI)               |
|                                | No fertility treatment<br>N=81,836        | Fertility treatment<br>N=5,522  | No fertility treatment<br>N=81,836 | Fertility treatment<br>N=5,522  | No fertility treatment<br>N=81,836 | Fertility treatment<br>N=5,522  |
| <b>Preterm birth</b><br>(week) |                                           |                                 |                                    |                                 |                                    |                                 |
| ≤ 37                           | 1.74(0.75-4.02)                           | 1.37(0.39-4.76)                 | 1.04(0.77-1.41)                    | 0.93(0.51-1.72)                 | 1.05(0.49-2.25)                    | 1.06(0.59-1.92)                 |
| ≥ 34 < 37                      | 0.37(0.05-2.69)                           | Empty                           | 1.02(0.71-1.47)                    | 1.20(0.62-2.33)                 | 1.24(0.55-2.80)                    | 0.97(0.47-2.02)                 |
| ≥ 28 < 34                      | 2.45(0.60-10.02)                          | 3.37(0.77-14.85)                | 0.94(0.48-1.81)                    | 0.55(0.13-2.25)                 | 0.64(0.09-4.61)                    | 1.47(0.59-3.60)                 |
| ≥ 22 < 28                      | 25.60(7.95-82.43)                         | 8.36(1.08-64.50)                | 2.13(0.68-6.69)                    | Empty                           | Empty                              | Empty                           |
| ≥ 22 < 34                      | 5.57(2.24-13.85)                          | 4.5(1.28-15.76)                 | 1.09(0.62-1.93)                    | 0.46(0.17-1.87)                 | 1.09(0.62-1.93)                    | 1.22(0.49-3.04)                 |
|                                | Singleton pregnancy<br>N= 89,338          | Multiple pregnancies<br>N=1,964 | Singleton pregnancy<br>N= 89,338   | Multiple pregnancies<br>N=1,964 | Singleton pregnancy<br>N= 89,338   | Multiple pregnancies<br>N=1,964 |
| <b>Preterm birth</b><br>(week) |                                           |                                 |                                    |                                 |                                    |                                 |
| ≤ 37                           | 1.90 (0.32-11.45)                         | 2.18 (1.17-4.05)                | 0.66 (0.34-1.30)                   | 1.02 (0.75-1.39)                | 1.17(0.53-2.59)                    | 1.33(0.81-2.16)                 |
| ≥ 34 < 37                      | 0.76 (0.24-2.40)                          | Empty                           | 0.99 (0.68-1.42)                   | 0.99 (0.49-2.03)                | 1.26(0.68-1.42)                    | 0.77(0.31-1.95)                 |
| ≥ 28 < 34                      | 3.41(1.25-9.28)                           | 4.40 (0.73-26.48)               | 0.96 (0.50-1.86)                   | 0.37 (0.09-1.53)                | 1.71(0.70-4.15)                    | 2.09(0.82-5.27)                 |
| ≥ 22 < 28                      | 22.32 (8.18-60.92)                        | 12.95 (1.41-118.77)             | 2.08 (0.66-6.56)                   | Empty                           | Empty                              | Empty                           |
| ≥ 22 < 34                      | 6.11 (2.99-12.51)                         | 8.4 (1.41-50.93)                | 1.11 (0.63-1.98)                   | 0.31 (0.75-1.31)                | 1.48(0.61-3.59)                    | 1.78(0.71-4.50)                 |

1  
2  
3  
4 We also stratified according to singleton pregnancies. Among singleton pregnant women with a fibroid  
5 diagnosis code before pregnancy, we found an increased risk of very preterm of OR 3.4 (1.25–9.28),  
6  
7 extreme preterm of; OR 22.3 (8.18–60.92), and the pooled group of very and extreme preterm birth of OR  
8  
9 6.1 (2.99–12.51). Apart from that, the risk of preterm birth was not increased in any other groups (Table III).  
10  
11 For multiple pregnancy women with a fibroid diagnosis code before pregnancy, we found an increased risk  
12  
13 of overall preterm of OR 2.2 (1.17–4.05), very preterm OR 4.4 (0.73–26.48), extreme preterm OR 13.0  
14  
15 (1.41–118.77), and pooled very and extreme preterm birth OR 8.5 (1.41–50.93). Apart from that, the risk of  
16  
17 preterm birth was not increased in any other groups (Table III). The risk of preterm birth was increased  
18  
19 regardless of stratification according to fertility treatment (with and without) and type of pregnancy  
20  
21 (singleton or multiple) (data not shown).  
22  
23  
24  
25  
26

#### 27 Caesarean section

28  
29  
30 The overall risk of CS was increased in women with a fibroid diagnosis code before pregnancy, OR 2.2  
31  
32 (1.50–3.21). The same applied after adjusting for age and BMI of OR 1.8 (1.23–2.72). The risk of acute CS  
33  
34 was not increased in the adjusted analyses, OR 1.5 (0.94–2.52). The risk of elective CS was increased, OR 2.6  
35  
36 (1.50–4.41), and the same applied after adjusting for age and BMI, OR 1.9 (1.11–3.32). For the group of  
37  
38 women with an operation code before pregnancy, the risk of CS was also increased; OR 2.6 (1.85–3.60) for  
39  
40 elective CS and OR 1.9 (1.44–2.52) for acute CS. The risk of CS was not increased in women with a fibroid  
41  
42 diagnosis code after pregnancy (Table II).  
43  
44  
45

#### 46 PPH, placental abruption, and IUGR

47  
48  
49 The risk of PPH, placental abruption and IUGR was not increased in women with a fibroid diagnosis code;  
50  
51 PPH OR 1.7 (0.70–3.65), placental abruption OR 1.4 (0.20–10.15), and IUGR OR 1.3 (0.57–2.85) (Table II).  
52  
53

#### 54 Uterine rupture

55  
56  
57  
58  
59  
60

1  
2  
3  
4 We found no uterine ruptures in the group with an operation code before pregnancy (N=317, 112  
5  
6 laparoscopic myomectomies, and 205 hysteroscopic myomectomies). Uterine rupture was diagnosed in 67  
7  
8 of the 91,292 (0.1%) women without a fibroid diagnosis code. Two women out of the 963 with a fibroid  
9  
10 diagnosis code after pregnancy (0.21%) were diagnosed with uterine rupture, and no women out of 124  
11  
12 (0%) had uterine rupture and a fibroid diagnosis code before pregnancy.  
13  
14

## 15 16 Discussion

17  
18  
19  
20 Women with a uterine fibroid diagnosis code had a significantly higher risk of preterm birth in general,  
21  
22 extreme preterm birth in particular. The fact that the association persisted through all the analyses,  
23  
24 irrespective of the mode of conception, number of foetuses, age, and BMI enhances the robustness and  
25  
26 significance of our results.  
27  
28

29  
30 Previous studies that differed in design in terms of exposure and outcome found weaker associations. A  
31  
32 previous systematic review from 2008 reported a cumulative preterm birth rate (before GA 37 weeks) of  
33  
34 16% among women with fibroids corresponding to an OR of 1.5 (1.3–1.7). None of the included studies,  
35  
36 however, adjusted for potential confounders such as age and BMI [8]. A recent case series from 2018  
37  
38 reported a preterm birth rate of 28% in women with uterine fibroids. This study did not include a reference  
39  
40 group without fibroids, and a calculation of the estimated risk was not possible [19]. All previous studies  
41  
42 used different classifications of preterm birth, which further complicates comparison. Three historical  
43  
44 cohort studies all showed an increased risk of preterm birth (GA <37 weeks), but they used different  
45  
46 categorisation regarding GA. Thus, Arisoy et al. reported an OR 4.7 (1.9–11.6) for preterm birth <37, OR 4.3  
47  
48 (2.0–13.9) for preterm birth <34 weeks, decreasing to OR 3.3 (0.8–13.4) for preterm birth <32 weeks [20].  
49  
50 Blitz et al also categorized preterm birth into groups depending on GA and found OR 1.61 (1.16–2.23) for  
51  
52 preterm birth 34–36 weeks, OR 2.99 (1.65–5.40) for preterm birth 32–33 weeks, OR 1.47 (0.59–3.67) for  
53  
54 28–31 weeks, and OR 1.81 (1.49–2.19) for 20–27 weeks[21]. In contrast, Lai et al. found an increased risk  
55  
56 of preterm birth with decreasing gestational age; OR 1.70 (1.12–2.58) for 24–34 weeks, OR 1.99 (1.05–3.75)  
57  
58  
59  
60

1  
2  
3  
4 for 24–28 weeks and OR 2.48 (1.38–4.44) for 20–27 weeks [22]. All three cohort studies included women  
5  
6 who had undergone a routine second-trimester obstetrical ultrasound, which was the basis for inclusion  
7  
8 into the exposure or control group. Women in our cohort study were included based on a fibroid diagnosis  
9  
10 code and we assume that many clinical insignificant fibroids with no symptoms were never diagnosed.  
11  
12 Therefore, women in our cohort are likely to be different from women with fibroids diagnosed by routine  
13  
14 ultrasound in pregnancy.  
15  
16

17  
18 In line with previous studies, women with a fibroid diagnosis code had an increased risk of elective  
19  
20 caesarean section. A review from 2016 based on 13 studies reported a cumulative CS frequency of 49%  
21  
22 corresponding to an unadjusted OR of 3.7 (3.5–3.9) [23]. These findings are in line with the clinical  
23  
24 guidelines of elective CS if the uterine fibroids are evaluated to infer a risk of mechanical obstruction or  
25  
26 malpresentation. Further, we found that women with a fibroid diagnosis code intended for vaginal delivery  
27  
28 had the same risk of acute CS as women without a fibroid diagnosis code.  
29  
30

31  
32 With regard to the risk of PPH, placental abruption, or IUGR, we found no differences between groups. In  
33  
34 contrast, a review from 2016, based on historical cohort studies, and a systematic review from 2008,  
35  
36 suggested an increased risk of all three outcomes [23]. However, other studies, which for different reasons  
37  
38 were not included in the systematic review, are consistent with our findings [9, 13, 20, 22, 24].  
39  
40

41  
42 We found no uterine ruptures following laparoscopic myomectomy (N = 112). The risk of uterine rupture  
43  
44 following laparoscopic myomectomy has been compared to the risk following uterine surgery such as CS  
45  
46 [23, 25, 26], and some authors have reported an increased risk of uterine rupture after myomectomy [27].  
47  
48 Based on clinical reasoning it is believed that surgical skills and techniques such as the use of bipolar  
49  
50 diathermy, and timespan from operation to pregnancy are essential factors for the risk of uterine rupture  
51  
52 after myomectomy. Our study did not allow the analysis for these factors. In Denmark, complex  
53  
54 laparoscopic myomectomy is preferentially performed by experienced surgeons and six months from  
55  
56  
57  
58  
59  
60

1  
2  
3  
4  
5  
6  
7  
8  
9  
10  
11  
12  
13  
14  
15  
16  
17  
18  
19  
20  
21  
22  
23  
24  
25  
26  
27  
28  
29  
30  
31  
32  
33  
34  
35  
36  
37  
38  
39  
40  
41  
42  
43  
44  
45  
46  
47  
48  
49  
50  
51  
52  
53  
54  
55  
56  
57  
58  
59  
60

operation to pregnancy is recommended. Both factors are likely to have contributed to the low rate of uterine rupture found in our study.

In a review from 2016, it was suggested that fibroid treatment minimises the risk of adverse negative obstetrical outcomes. However, they also concluded that more clinical studies are needed to draw firm conclusions as findings are still inconsistent [28]. Our results support a strategy of removing the fibroid prior to pregnancy in order to minimise the risk of preterm birth. A Randomized Controlled Trial, which would be optimal for firm conclusions, is not possible due to ethical considerations. At best, a large cohort study with detailed exposure and outcome information can give further information.

#### Limitations

Our results are based on retrospective data, and the number of events was small despite the large size of the cohort. We found a low prevalence of uterine fibroid diagnosis codes in our study population compared to previous reports [29]. It might indicate that women participating in DNBC consisted of a selected group of women [30].

Our exposure registration was based on clinical diagnosis coding, which may be incorrect or missing and lead to exposure misclassification. We found that some women had an operation code, but no diagnosis code, substantiating this hypothesis. In Denmark, operation codes are more closely connected to hospital budgets than clinical diagnosis codes. Diagnosis codes may be underreported and explain the relatively few numbers of diagnosed uterine fibroids in our study. We did not have the possibility to validate the data from the DNPR. However, others previously did so and concluded that the data were suitable for clinical quality control [31].

A short cervix in early pregnancy has been associated with uterine fibroids and may represent part of the mechanism behind the risk of preterm birth among women with uterine fibroids [7, 21]. Unfortunately, we

1  
2  
3  
4 did not have the opportunity to investigate the contribution of cervical length on preterm birth due to the  
5  
6 lack of a specific diagnosis code.  
7  
8

## 9 10 Conclusions

11  
12  
13 The present study, including 92,696 pregnancies, found a strong association between a uterine fibroid  
14  
15 diagnosis and the risk of preterm birth in general and extreme preterm birth in particular. We suggest that  
16  
17 future clinical studies focus on the relationship between obstetrical outcomes and fibroids in terms of  
18  
19 anatomical location, growth throughout pregnancy, and cervical length.  
20  
21  
22  
23  
24  
25

## 26 Funding

27  
28  
29 The corresponding author has been financially supported by the University of Southern Denmark, the  
30  
31 Region of Southern Denmark, and the Department of Gynecology and Obstetrics at Odense University  
32  
33 Hospital, Denmark.  
34  
35  
36  
37  
38

## 39 Disclosure of Interests

40  
41  
42 Completed ICMJE disclosure of interest forms are available to view online as supporting information.  
43  
44  
45

## 46 Author statement

47  
48 K.K: Project development, Data management, Data analysis, Manuscript writing/editing

49  
50 U.S.K: Project development, Data analysis, Manuscript writing

51  
52 O.M: Project development, Data analysis, Manuscript writing

53  
54 P.H: Project development, Data analysis, Manuscript writing

55  
56 P.R: Project development, Data analysis, Manuscript writing  
57  
58  
59  
60

## References

1. Laughlin, S.K., et al., *Prevalence of uterine leiomyomas in the first trimester of pregnancy: an ultrasound-screening study*. *Obstet Gynecol*, 2009. **113**(3): p. 630-5.
2. Statistik, D., 2018.
3. Matthiessen, J. and A. Stockmarr, *Flere overvægtige danske kvinder*. E-artikel fra DTU Fødevareinstituttet, nr. 2,, 2015. **E-artikel fra DTU Fødevareinstituttet, nr. 2, 2015**.
4. Blum, M., *Comparative study of serum CAP activity during pregnancy in malformed and normal uterus*. *J Perinat Med*, 1978. **6**(3): p. 165-8.
5. Rice, J.P., H.H. Kay, and B.S. Mahony, *The clinical significance of uterine leiomyomas in pregnancy*. *Am J Obstet Gynecol*, 1989. **160**(5 Pt 1): p. 1212-6.
6. Coronado, G.D., L.M. Marshall, and S.M. Schwartz, *Complications in pregnancy, labor, and delivery with uterine leiomyomas: a population-based study*. *Obstet Gynecol*, 2000. **95**(5): p. 764-9.
7. Shavell, V.I., et al., *Adverse obstetric outcomes associated with sonographically identified large uterine fibroids*. *Fertil Steril*, 2012. **97**(1): p. 107-10.
8. Klatsky, P.C., et al., *Fibroids and reproductive outcomes: a systematic literature review from conception to delivery*. *Am J Obstet Gynecol*, 2008. **198**(4): p. 357-66.
9. Nyflot, L.T., et al., *Risk factors for severe postpartum hemorrhage: a case-control study*. *BMC Pregnancy Childbirth*, 2017. **17**(1): p. 17.
10. Ouyang, D.W., K.E. Economy, and E.R. Norwitz, *Obstetric complications of fibroids*. *Obstet Gynecol Clin North Am*, 2006. **33**(1): p. 153-69.
11. Olive, D.L. and E.A. Pritts, *Fibroids and reproduction*. *Semin Reprod Med*, 2010. **28**(3): p. 218-27.
12. Cook, H., et al., *The impact of uterine leiomyomas on reproductive outcomes*. *Minerva Ginecol*, 2010. **62**(3): p. 225-36.
13. Martin, J., et al., *Obstetrical Outcomes of Ultrasound Identified Uterine Fibroids in Pregnancy*. *Am J Perinatol*, 2016. **33**(12): p. 1218-22.
14. Lam, S.J., S. Best, and S. Kumar, *The impact of fibroid characteristics on pregnancy outcome*. *Am J Obstet Gynecol*, 2014. **211**(4): p. 395.e1-5.
15. Pritts, E.A., W.H. Parker, and D.L. Olive, *Fibroids and infertility: an updated systematic review of the evidence*. *Fertil Steril*, 2009. **91**(4): p. 1215-23.
16. Olsen, S.F., et al., *The Danish National Birth Cohort--its background, structure and aim*. *Scand J Public Health*, 2001. **29**(4): p. 300-7.
17. de Onis, M. and J.P. Habicht, *Anthropometric reference data for international use: recommendations from a World Health Organization Expert Committee*. *Am J Clin Nutr*, 1996. **64**(4): p. 650-8.
18. Textor, J., J. Hardt, and S. Knuppel, *DAGitty: a graphical tool for analyzing causal diagrams*. *Epidemiology*, 2011. **22**(5): p. 745.
19. Saleh, H.S., et al., *Does Uterine Fibroid Adversely Affect Obstetric Outcome of Pregnancy?* *Biomed Res Int*, 2018. **2018**: p. 8367068.
20. Arisoy, R., et al., *Obstetric outcomes of intramural leiomyomas in pregnancy*. *Clin Exp Obstet Gynecol*, 2016. **43**(6): p. 844-848.
21. Blitz, M.J., et al., *Uterine fibroids at routine second-trimester ultrasound survey and risk of sonographic short cervix*. *J Matern Fetal Neonatal Med*, 2016. **29**(21): p. 3454-60.
22. Lai, J., et al., *Neonatal outcomes in women with sonographically identified uterine leiomyomata*. *J Matern Fetal Neonatal Med*, 2012. **25**(6): p. 710-3.
23. Ezzedine, D. and E.R. Norwitz, *Are Women With Uterine Fibroids at Increased Risk for Adverse Pregnancy Outcome?* *Clin Obstet Gynecol*, 2016. **59**(1): p. 119-27.
24. Ciavattini, A., et al., *Number and size of uterine fibroids and obstetric outcomes*. *J Matern Fetal Neonatal Med*, 2015. **28**(4): p. 484-8.

- 1
- 2
- 3
- 4
- 5 25. Pistofidis, G., et al., *Report of 7 uterine rupture cases after laparoscopic myomectomy: update of*
- 6 *the literature*. J Minim Invasive Gynecol, 2012. **19**(6): p. 762-7.
- 7 26. Milazzo, G.N., et al., *Myoma and myomectomy: Poor evidence concern in pregnancy*. J Obstet
- 8 Gynaecol Res, 2017. **43**(12): p. 1789-1804.
- 9 27. Kim, M.S., et al., *Obstetric outcomes after uterine myomectomy: Laparoscopic versus laparotomic*
- 10 *approach*. Obstet Gynecol Sci, 2013. **56**(6): p. 375-81.
- 11 28. Parazzini, F., L. Tozzi, and S. Bianchi, *Pregnancy outcome and uterine fibroids*. Best Pract Res Clin
- 12 Obstet Gynaecol, 2016. **34**: p. 74-84.
- 13 29. Baird, D.D., et al., *High cumulative incidence of uterine leiomyoma in black and white women:*
- 14 *ultrasound evidence*. Am J Obstet Gynecol, 2003. **188**(1): p. 100-7.
- 15 30. Jacobsen, T.N., E.A. Nohr, and M. Frydenberg, *Selection by socioeconomic factors into the Danish*
- 16 *National Birth Cohort*. Eur J Epidemiol, 2010. **25**(5): p. 349-55.
- 17 31. Lidegaard, O., C.H. Vestergaard, and M.S. Hammerum, *[Quality monitoring based on data from the*
- 18 *Danish National Patient Registry]*. Ugeskr Laeger, 2009. **171**(6): p. 412-5.
- 19
- 20
- 21
- 22
- 23
- 24
- 25
- 26
- 27
- 28
- 29
- 30
- 31
- 32
- 33
- 34
- 35
- 36
- 37
- 38
- 39
- 40
- 41
- 42
- 43
- 44
- 45
- 46
- 47
- 48
- 49
- 50
- 51
- 52
- 53
- 54
- 55
- 56
- 57
- 58
- 59
- 60



## STROBE Statement—checklist of items that should be included in reports of observational studies

|                              | Item No | Recommendation                                                                                                                                                                                                                                                                                                                                                                                                                                                                                                                                                                                                                                                                                       |
|------------------------------|---------|------------------------------------------------------------------------------------------------------------------------------------------------------------------------------------------------------------------------------------------------------------------------------------------------------------------------------------------------------------------------------------------------------------------------------------------------------------------------------------------------------------------------------------------------------------------------------------------------------------------------------------------------------------------------------------------------------|
| <b>Title and abstract</b>    | 1       | ✓ (a) Indicate the study's design with a commonly used term in the title or the abstract<br>✓ (b) Provide in the abstract an informative and balanced summary of what was done and what was found                                                                                                                                                                                                                                                                                                                                                                                                                                                                                                    |
| <b>Introduction</b>          |         |                                                                                                                                                                                                                                                                                                                                                                                                                                                                                                                                                                                                                                                                                                      |
| Background/rationale         | 2       | ✓ Explain the scientific background and rationale for the investigation being reported                                                                                                                                                                                                                                                                                                                                                                                                                                                                                                                                                                                                               |
| Objectives                   | 3       | ✓ State specific objectives, including any prespecified hypotheses                                                                                                                                                                                                                                                                                                                                                                                                                                                                                                                                                                                                                                   |
| <b>Methods</b>               |         |                                                                                                                                                                                                                                                                                                                                                                                                                                                                                                                                                                                                                                                                                                      |
| Study design                 | 4       | ✓ Present key elements of study design early in the paper                                                                                                                                                                                                                                                                                                                                                                                                                                                                                                                                                                                                                                            |
| Setting                      | 5       | ✓ Describe the setting, locations, and relevant dates, including periods of recruitment, exposure, follow-up, and data collection                                                                                                                                                                                                                                                                                                                                                                                                                                                                                                                                                                    |
| Participants                 | 6       | ✓ (a) <i>Cohort study</i> —Give the eligibility criteria, and the sources and methods of selection of participants. Describe methods of follow-up<br><i>Case-control study</i> —Give the eligibility criteria, and the sources and methods of case ascertainment and control selection. Give the rationale for the choice of cases and controls<br><i>Cross-sectional study</i> —Give the eligibility criteria, and the sources and methods of selection of participants<br>✓ (b) <i>Cohort study</i> —For matched studies, give matching criteria and number of exposed and unexposed<br><i>Case-control study</i> —For matched studies, give matching criteria and the number of controls per case |
| Variables                    | 7       | ✓ Clearly define all outcomes, exposures, predictors, potential confounders, and effect modifiers. Give diagnostic criteria, if applicable                                                                                                                                                                                                                                                                                                                                                                                                                                                                                                                                                           |
| Data sources/<br>measurement | 8*      | ✓ For each variable of interest, give sources of data and details of methods of assessment (measurement). Describe comparability of assessment methods if there is more than one group                                                                                                                                                                                                                                                                                                                                                                                                                                                                                                               |
| Bias                         | 9       | ✓ Describe any efforts to address potential sources of bias                                                                                                                                                                                                                                                                                                                                                                                                                                                                                                                                                                                                                                          |
| Study size                   | 10      | ✓ Explain how the study size was arrived at                                                                                                                                                                                                                                                                                                                                                                                                                                                                                                                                                                                                                                                          |
| Quantitative variables       | 11      | ✓ Explain how quantitative variables were handled in the analyses. If applicable, describe which groupings were chosen and why                                                                                                                                                                                                                                                                                                                                                                                                                                                                                                                                                                       |
| Statistical methods          | 12      | ✓ (a) Describe all statistical methods, including those used to control for confounding<br>✓ (b) Describe any methods used to examine subgroups and interactions<br>✓ (c) Explain how missing data were addressed<br>✓ (d) <i>Cohort study</i> —If applicable, explain how loss to follow-up was addressed<br><i>Case-control study</i> —If applicable, explain how matching of cases and controls was addressed<br><i>Cross-sectional study</i> —If applicable, describe analytical methods taking account of sampling strategy<br>✓ (e) Describe any sensitivity analyses                                                                                                                          |

Continued on next page

| <b>Results</b>           |     |                                                                                                                                                                                                                                                                                                                                                                                                                                    |
|--------------------------|-----|------------------------------------------------------------------------------------------------------------------------------------------------------------------------------------------------------------------------------------------------------------------------------------------------------------------------------------------------------------------------------------------------------------------------------------|
| Participants             | 13* | <p>✓ (a) Report numbers of individuals at each stage of study—eg numbers potentially eligible, examined for eligibility, confirmed eligible, included in the study, completing follow-up, and analysed</p> <p>✓ (b) Give reasons for non-participation at each stage</p> <p>✓ (c) Consider use of a flow diagram</p>                                                                                                               |
| Descriptive data         | 14* | <p>✓ (a) Give characteristics of study participants (eg demographic, clinical, social) and information on exposures and potential confounders</p> <p>✓ (b) Indicate number of participants with missing data for each variable of interest</p> <p>✓ (c) <i>Cohort study</i>—Summarise follow-up time (eg, average and total amount)</p>                                                                                            |
| Outcome data             | 15* | <p>✓ <i>Cohort study</i>—Report numbers of outcome events or summary measures over time</p> <p><i>Case-control study</i>—Report numbers in each exposure category, or summary measures of exposure</p> <p><i>Cross-sectional study</i>—Report numbers of outcome events or summary measures</p>                                                                                                                                    |
| Main results             | 16  | <p>✓ (a) Give unadjusted estimates and, if applicable, confounder-adjusted estimates and their precision (eg, 95% confidence interval). Make clear which confounders were adjusted for and why they were included</p> <p>✓ (b) Report category boundaries when continuous variables were categorized</p> <p>✓ (c) If relevant, consider translating estimates of relative risk into absolute risk for a meaningful time period</p> |
| Other analyses           | 17  | Report other analyses done—eg analyses of subgroups and interactions, and sensitivity analyses                                                                                                                                                                                                                                                                                                                                     |
| <b>Discussion</b>        |     |                                                                                                                                                                                                                                                                                                                                                                                                                                    |
| Key results              | 18  | ✓ Summarise key results with reference to study objectives                                                                                                                                                                                                                                                                                                                                                                         |
| Limitations              | 19  | ✓ Discuss limitations of the study, taking into account sources of potential bias or imprecision. Discuss both direction and magnitude of any potential bias                                                                                                                                                                                                                                                                       |
| Interpretation           | 20  | ✓ Give a cautious overall interpretation of results considering objectives, limitations, multiplicity of analyses, results from similar studies, and other relevant evidence                                                                                                                                                                                                                                                       |
| Generalisability         | 21  | ✓ Discuss the generalisability (external validity) of the study results                                                                                                                                                                                                                                                                                                                                                            |
| <b>Other information</b> |     |                                                                                                                                                                                                                                                                                                                                                                                                                                    |
| Funding                  | 22  | ✓ Give the source of funding and the role of the funders for the present study and, if applicable, for the original study on which the present article is based                                                                                                                                                                                                                                                                    |

\*Give information separately for cases and controls in case-control studies and, if applicable, for exposed and unexposed groups in cohort and cross-sectional studies.

**Note:** An Explanation and Elaboration article discusses each checklist item and gives methodological background and published examples of transparent reporting. The STROBE checklist is best used in conjunction with this article (freely available on the Web sites of PLoS Medicine at <http://www.plosmedicine.org/>, Annals of Internal Medicine at <http://www.annals.org/>, and Epidemiology at <http://www.epidem.com/>). Information on the STROBE Initiative is available at [www.strobe-statement.org](http://www.strobe-statement.org).

# BMJ Open

## The relationship between a uterine fibroid diagnosis and the risk of adverse obstetrical outcomes, a cohort study.

|                                 |                                                                                                                                                                                                                                                                                                                                                                                                                                                                                                                                                                                                            |
|---------------------------------|------------------------------------------------------------------------------------------------------------------------------------------------------------------------------------------------------------------------------------------------------------------------------------------------------------------------------------------------------------------------------------------------------------------------------------------------------------------------------------------------------------------------------------------------------------------------------------------------------------|
| Journal:                        | <i>BMJ Open</i>                                                                                                                                                                                                                                                                                                                                                                                                                                                                                                                                                                                            |
| Manuscript ID                   | bmjopen-2019-032104.R1                                                                                                                                                                                                                                                                                                                                                                                                                                                                                                                                                                                     |
| Article Type:                   | Original research                                                                                                                                                                                                                                                                                                                                                                                                                                                                                                                                                                                          |
| Date Submitted by the Author:   | 09-Dec-2019                                                                                                                                                                                                                                                                                                                                                                                                                                                                                                                                                                                                |
| Complete List of Authors:       | karlsen, kamilla; University of Southern Denmark, Gynecology and Obstetrics<br>Schjøler Kesmodel, Ulrik; Institute of Clinical Research, University of Southern Denmark, Research Unit of Gynecology; Aalborg Universitet, Department of Clinical Medicine<br>Mogensen, Ole; Aarhus University Hospital and Faculty of Health, Aarhus University, Aarhus, Denmark<br>Humaidan, Peter; The Fertility Clinic, Skive Regional Hospital; Aarhus Universitet, Faculty of Health<br>Ravn, Pernille; Syddansk Universitet, Clinical Institut; Odense University Hospital, Department of Gynecology and Obstetrics |
| <b>Primary Subject Heading</b>: | Obstetrics and gynaecology                                                                                                                                                                                                                                                                                                                                                                                                                                                                                                                                                                                 |
| Secondary Subject Heading:      | Epidemiology, Obstetrics and gynaecology                                                                                                                                                                                                                                                                                                                                                                                                                                                                                                                                                                   |
| Keywords:                       | Uterine fibroids, Preterm birth, Obstetrical complications                                                                                                                                                                                                                                                                                                                                                                                                                                                                                                                                                 |
|                                 |                                                                                                                                                                                                                                                                                                                                                                                                                                                                                                                                                                                                            |

SCHOLARONE™  
Manuscripts



I, the Submitting Author has the right to grant and does grant on behalf of all authors of the Work (as defined in the below author licence), an exclusive licence and/or a non-exclusive licence for contributions from authors who are: i) UK Crown employees; ii) where BMJ has agreed a CC-BY licence shall apply, and/or iii) in accordance with the terms applicable for US Federal Government officers or employees acting as part of their official duties; on a worldwide, perpetual, irrevocable, royalty-free basis to BMJ Publishing Group Ltd ("BMJ") its licensees and where the relevant Journal is co-owned by BMJ to the co-owners of the Journal, to publish the Work in this journal and any other BMJ products and to exploit all rights, as set out in our [licence](#).

The Submitting Author accepts and understands that any supply made under these terms is made by BMJ to the Submitting Author unless you are acting as an employee on behalf of your employer or a postgraduate student of an affiliated institution which is paying any applicable article publishing charge ("APC") for Open Access articles. Where the Submitting Author wishes to make the Work available on an Open Access basis (and intends to pay the relevant APC), the terms of reuse of such Open Access shall be governed by a Creative Commons licence – details of these licences and which [Creative Commons](#) licence will apply to this Work are set out in our licence referred to above.

Other than as permitted in any relevant BMJ Author's Self Archiving Policies, I confirm this Work has not been accepted for publication elsewhere, is not being considered for publication elsewhere and does not duplicate material already published. I confirm all authors consent to publication of this Work and authorise the granting of this licence.

1  
2  
3  
4 Title page  
5

6  
7 Title

8  
9 The relationship between a uterine fibroid diagnosis and the risk of adverse obstetrical outcomes, a cohort  
10 study.  
11

12 Running title

13  
14 Uterine fibroids and preterm birth  
15

16 Corresponding Author

17  
18 K. Karlsen, MD, PhD student, University of Southern Denmark, Department of Gynecology and Obstetrics,  
19 Odense University Hospital, Klørvænget 10, 10<sup>th</sup> floor, 5000 Odense C, Denmark, [Kamilla.karlsen@rsyd.dk](mailto:Kamilla.karlsen@rsyd.dk)  
20  
21

22 Co-authors

23  
24 U.S. Kesmodel, Professor, MD, PhD, Aalborg University Hospital, Aalborg, and Department of Clinical  
25 Medicin, Aalborg University, Denmark  
26

27  
28 O. Mogensen, Professor, MD, DMSc, Aarhus University Hospital and Faculty of Health, Aarhus University,  
29 Aarhus, Denmark  
30

31  
32 P. Humaidan, Professor, MD, DMSc, The Fertility Clinic, Skive Regional Hospital, Skive, and Faculty of Health,  
33 Aarhus University, Aarhus, Denmark  
34

35  
36 P. Ravn, Associate professor, MD, DMSc, Department of Gynecology and Obstetrics, Odense University  
Hospital, Klørvænget 10, 10<sup>th</sup> floor, 5000 Odense C, Denmark  
37  
38  
39

40 Word count: 3.661 words

41  
42 Key words: Uterine fibroids, Preterm birth  
43  
44  
45  
46  
47  
48  
49  
50  
51  
52  
53  
54  
55  
56  
57  
58  
59  
60



1  
2  
3  
4  
5  
6  
7  
8  
9  
10  
11  
12  
13  
14  
15  
16  
17  
18  
19  
20  
21  
22  
23  
24  
25  
26  
27  
28  
29  
30  
31  
32  
33  
34  
35  
36  
37  
38  
39  
40  
41  
42  
43  
44  
45  
46  
47  
48  
49  
50  
51  
52  
53  
54  
55  
56  
57  
58  
59  
60

## Abstract

**Objective:** The aim was to investigate the association between clinically significant uterine fibroids and preterm birth, caesarean section (CS), postpartum haemorrhage (PPH), placental abruption, intrauterine growth restriction (IUGR), and uterine rupture.

**Methods, participants, and setting:** A historical cohort study based on data from the Danish National Birth Cohort (DNBC), the Danish National Patient Registry (DNPR), and the Danish National Birth Registry (DNBR). The final study population consisted of 92,696 pregnancies and was divided into four groups for comparison. Group 1: pregnancies of women without a fibroid diagnosis code or fibroid operation code; Group 2: pregnancies of women with a fibroid diagnosis code before pregnancy, during pregnancy, or up to one year after delivery, and no fibroid operation code before pregnancy; Group 3: pregnancies of women with a fibroid diagnosis code given more than one year after delivery; and Group 4: pregnancies of women with a fibroid operation code given before pregnancy.

**Results:** A diagnosis of fibroids before pregnancy yielded an increased risk of preterm birth (gestational age (GA)  $\leq 37$  weeks) (OR 2.27 (1.30–3.96)) and extreme preterm birth (GA 22+0–27+6 weeks, OR 20.09 (8.04–50.22)). The risk of CS was increased (OR 1.83 (1.23–2.72)) for women with a fibroid diagnosis code given before pregnancy; significantly increased risk of elective CS (OR 1.92 (1.11–3.32)), but not acute CS (OR 1.54 (0.94–2.52)). The risks of PPH, placental abruption or IUGR were not increased in any of the groups.

**Conclusion:** We found a strong association between clinically significant uterine fibroids and preterm birth, and an association between clinically significant uterine fibroids and CS. In contrast, no association between clinically significant uterine fibroids and PPH, placental abruption, or IUGR was seen.

## Strengths and limitations of this study:

- This study explores an area with inconsistent evidence.
- This study is a large cohort study with data from 92,696 pregnancies.
- Limitations include a low prevalence of uterine fibroids and a small number of events.

## Introduction

As many as 10 % of pregnant women may have uterine fibroids [1], and the incidence is likely to be even higher in populations with high maternal age and obesity [2, 3]. Fibroids may affect the uterine cavity, the placenta, and the foetus directly, but may also cause the myometrium to be more inflexible and less responsive to oxytocin [4, 5]. Overall, fibroids are associated with obstetrical complication rates of 10–40 % [6, 7], many of which have severe consequences. Due to the clinical impact on the mother and child, outcomes such as preterm birth, caesarean section (CS), postpartum haemorrhage (PPH), placental abruption, intrauterine growth restriction (IUGR), and uterine rupture have been evaluated in relation to uterine fibroids [6-11]. Some studies showed an association between fibroids and preterm birth, CS, PPH, and placental abruption [8, 9, 12-14], whereas other studies showed no association with preterm birth, CS, PPH, and IUGR [7, 13, 15].

To address these discrepancies, we conducted a large historical cohort study of unselected pregnant women. We focused on women with clinically significant fibroids and compared women with a uterine fibroid diagnosis code to a reference group of women without a uterine fibroid diagnosis code. The aim was to investigate the association between clinically significant uterine fibroids and obstetrical outcomes with a

1  
2  
3  
4 specific focus on preterm birth, CS, PPH, placental abruption, IUGR, and uterine rupture. Moreover, we  
5  
6 analysed the association between myomectomy and the risk of uterine rupture.  
7  
8  
9  
10  
11

## 12 Materials and methods

13  
14  
15  
16 This historical cohort study is based on data from the Danish National Birth Cohort (DNBC), the Danish  
17  
18 National Birth Registry (DNBR), and the Danish National Patient Registry (DNPR).  
19

### 20 Study population

21  
22  
23  
24 The DNBC is a pregnancy cohort consisting of data from 92,840 women and 101,042 pregnancies. All  
25  
26 registered pregnancies were included. Enrolment was performed in early pregnancy during the period  
27  
28 between 1996–2002. Inclusion criteria were the intention to carry a pregnancy to term, residency in  
29  
30 Denmark, and sufficient Danish proficiency to participate in telephone interviews. Data was collected by  
31  
32 computer-assisted telephone interviews twice during pregnancy, and subsequently when the children were  
33  
34 six and eighteen months old. The DNBC data collection was approved by the Danish National Ethics Board.  
35  
36 More details about this cohort have previously been described in detail [16].  
37  
38

39  
40 The DNPR holds diagnosis and operation codes from all in-patients since 1977 and out-patients since 1995.  
41  
42 The codes are classified according to the International Classification of Diseases ICD10 since 1994. Diagnosis  
43  
44 and operation codes regarding fibroids were collected for this study.  
45  
46

47  
48 The DNBR contains information about live births and complications of all registered births in Denmark since  
49  
50 1973.  
51

52  
53 Selected relevant data from the DNPR and the DNBR was linked to data from the DNBC, using the unique  
54  
55 personal identification number given to all residents in Denmark.  
56  
57  
58  
59  
60



## Data

We collected data on maternal age, height, weight, smoking habits, expected date of birth, and fertility treatment (regardless of mode of assisted reproductive technique) from the DNBC. Maternal body mass index (BMI) ( $\text{kg}/\text{m}^2$ ) was calculated based on self-reported pre-pregnancy weight and height.

Fibroid diagnosis codes (DD25–DD259) and fibroid operation codes were collected from the DNPR.

Operation codes were: myomectomy (KLCB10), laparoscopic myomectomy (KLCB11), hysteroscopic myomectomy (KLCB20), hysteroscopic resection of pathological tissue (KLCB22), hysteroscopic excision of pathological tissue (KLCB25), and hysteroscopic excision of other pathological tissue (KLCB98). We categorised operation codes into laparoscopic or open myomectomy (KLCB10, KLCB11) and hysteroscopic myomectomy (KLCB20, KLCB22, KLCB25, and KLCB98). Operation codes of the resection and excision of pathological tissue were pooled into one group of myomectomy since we assumed that many use these codes for hysteroscopic myomectomy.

Gestational age (GA), birth weight of the child, and data on obstetrical outcomes (caesarean section (KMCA10A, KMCA10D, KMCA10E, and KMCA10B), placental abruption (DO450, DO451, DO452, DO453, DO458, and DO459)), and PPH (DO720, DO721, DO721A, and DO721B) were collected from the DNBR.

## Exposure definition

The study population was divided into four groups for comparison. Group 1: pregnancies of women without a fibroid diagnosis code or operation code; Group 2: pregnancies of women with a fibroid diagnosis code before pregnancy, during pregnancy, or up to one year after delivery, and no operation code before pregnancy; Group 3: pregnancies of women with a fibroid diagnosis code given more than one year after delivery; and Group 4: pregnancies of women with an operation code given before pregnancy.

## Outcome definition

1  
2  
3  
4 The outcomes were preterm birth, CS, placental abruption, PPH, IUGR and uterine rupture.

5  
6  
7 Preterm birth was defined as delivery at GA 22+0–36+6 weeks. We divided preterm birth into three  
8  
9 categories according to the international classifications. Moderate preterm: GA 34+0–36+6 weeks, very  
10  
11 preterm: GA 28+0–33+6 weeks, and extreme preterm: GA 22+0–27+6 weeks. Due to the small number of  
12  
13 events, we merged the groups into clinically relevant binary outcomes: moderate preterm: GA 34+0–36+6  
14  
15 weeks and very and extreme preterm GA 22+0–33+6 weeks.

16  
17  
18  
19 CS was categorised as acute (KMCA10A, KMCA10D, and KMCA10E) or elective (KMCA10B).

20  
21  
22 Placental abruption was reported under several diagnosis codes (DO450, DO451, DO452, DO453, DO458,  
23  
24 and DO458) and pooled into one group.

25  
26  
27  
28 PPH was defined as bleeding during delivery and up to 24 hours postpartum (DO720, DO721, DO721A, and  
29  
30 DO721B).

31  
32  
33 We followed the international classification of small of gestational age/IUGR as a birth weight below -22%  
34  
35 of the expected weight at a given GA. This classification was originally developed by the 1995 World Health  
36  
37 Organization (WHO) expert committee [17]. We used a lower limit of -60 % based on clinical reasoning; all  
38  
39 births with an expected birth weight below -60% were excluded due to potential misclassification.

40  
41  
42 Data from the group of women who had a myomectomy before pregnancy was used to analyse the  
43  
44 association between myomectomy and the risk of uterine rupture (DO710, DO711).

#### 45 46 47 48 Data purification

49  
50  
51 During the data purification, we made some assumptions. If a uterine fibroid diagnosis code was given  
52  
53 once, the woman was categorised as having at least one uterine fibroid during the study period, unless she  
54  
55 had a fibroid operation code. A fibroid diagnosis code given more than 90 days after a fibroid operation  
56  
57 code was interpreted as a new uterine fibroid. We assumed the fibroid to be present also before  
58  
59  
60

1  
2  
3  
4 pregnancy, if a fibroid diagnosis code was given during pregnancy or up to one year postpartum, and data  
5  
6 were included in the fibroid group.  
7

8  
9 Missing values were identified and analysed. We had an 87% complete dataset. Missing values were  
10  
11 imputed by multiple imputations of multiple variables (MICE) assuming that values were missing at  
12  
13 random. Analyses were made before and after imputation.  
14  
15

16  
17 We identified the potential confounders for each outcome based on the DAG (directed acyclic graph) [18].  
18  
19 For preterm birth, CS, and PPH, we identified maternal age and BMI to be possible confounders. For  
20  
21 placental abruption, we identified maternal age to be a possible confounder. For IUGR and uterine rupture,  
22  
23 we did not identify any possible confounders.  
24

25  
26  
27 We found that 317 women had a myomectomy before pregnancy (205 by hysteroscopy and 112 by  
28  
29 laparoscopy).  
30

### 31 32 Statistical analyses 33

34  
35 A one-way ANOVA was used for comparison of normally distributed data such as age. The Kruskal–Wallis  
36  
37 test was used for comparison of non-normally distributed data such as BMI and parity. Smoking habits and  
38  
39 fertility treatment were compared using the Chi–square test.  
40

41  
42  
43 We used logistic regression analysis to compare the binary outcomes; preterm birth, CS, PPH, placental  
44  
45 abruption, IUGR, and uterine rupture. We adjusted for potential confounders identified by DAGs in all  
46  
47 analyses (maternal age and body mass index). By using robust standard errors, we accounted for some  
48  
49 women being included with more than one pregnancy in the analyses.  
50

51  
52 We found the tests acceptable based on the Hosmer–Lemeshow goodness of fit test.  
53

54  
55 Subgroup analyses of women with a fibroid operation code before pregnancy were performed.  
56

57  
58 We performed stratified analyses for preterm birth regarding fertility treatment and multiple pregnancies.  
59  
60

All analyses were performed in STATA 15.

#### Patient and Public involvement statement

Participant in the DNBC are involved in all research based on data from the DNBC. A member of the DNBC ambassadors, which is a group of selected participants representing all participants, is represented in the DNBC reference group. There was no other patient or public involvement in this study.

#### Ethical approval

This study was approved by the Danish Data Protecting Agency (registration number; 2012-58-0018).

According to Danish law, ethical approval is not required for registry-based studies.

#### Results

Our final study population consisted of 86,323 women and 92,696 pregnancies, divided into the four exposure groups. (Fig. 1)

Population characteristics for the four exposure groups are shown in Table 1. The groups did not differ regarding BMI, but they differed regarding age, smoking habits, parity, multiple pregnancies, and proportion of fertility treatment.

Table 1: Population characteristics

|               | No fibroids<br>Group 1<br>(reference group) | Fibroids before pregnancy<br>No operation<br>Group 2 | Fibroids after pregnancy<br>Group 3 | Fibroid operation before pregnancy<br>Group 4 |
|---------------|---------------------------------------------|------------------------------------------------------|-------------------------------------|-----------------------------------------------|
| Population, N | 91,292                                      | 124                                                  | 963                                 | 317                                           |

|                                                |            |            |            |            |
|------------------------------------------------|------------|------------|------------|------------|
| <b>Age ,years<br/>Mean(SD)</b>                 | 30 (4.29)  | 34 (4.15)  | 32 (3.96)  | 34 (4.16)  |
| <b>BMI, kg/m<sup>2</sup><br/>median(range)</b> | 23 (10-64) | 23 (16-40) | 23 (16-49) | 22 (18-35) |
| <b>Parity<br/>median (range)</b>               | 1 (0-14)   | 1 (0-3)    | 1 (0-5)    | 0 (0-3)    |
| <b>Smoking, %</b>                              | 16.43      | 11.82      | 16.04      | 13.15      |
| <b>Fertility treatment, %</b>                  | 6.32       | 18.48      | 9.76       | 39.39      |
| <b>Multiple pregnancy,%</b>                    | 2.14       | 4.03       | 3.95       | 7.89       |

#### Preterm birth

The risk of overall preterm birth was increased among the group of women who had a fibroid diagnosis code before pregnancy (group 2) compared to women without a fibroid diagnosis code (group 1), OR 2.3 (1.30–3.96). The risk of moderately preterm birth was not increased, OR 0.6 (0.20–1.96), whereas the risk of very preterm, extreme preterm, and the pooled group of very and extreme preterm birth, was significantly increased, OR 4.00 (1.75–9.13), OR 20.1 (8.04–50.22), and OR 6.5 (3.51–12.19), respectively. For the group of women with a fibroid diagnosis code after pregnancy (group 3), the risk of preterm birth was not increased. The group of women who had an operation before pregnancy (group 4) had an

increased risk of overall preterm birth of OR 1.8 (1.24–2.65) and very preterm birth OR 2.8 (1.55–5.22).

None delivered extremely preterm (Table 2).

Tabel 2 Results

|                              | No fibroids<br>Group 1<br>(reference<br>group) | Fibroids before<br>pregnancy<br>No operation<br>Group 2 | Odds ratio (95%CI) | Fibroids after<br>pregnancy<br>Group 3 | Odds ratio (95%CI) | Fibroid operation before<br>pregnancy<br>Group 4 | Odds ratio<br>(95%CI) |
|------------------------------|------------------------------------------------|---------------------------------------------------------|--------------------|----------------------------------------|--------------------|--------------------------------------------------|-----------------------|
|                              | (N=91,292)                                     | (N=124)                                                 |                    | (N=963)                                |                    | (N=317)                                          |                       |
| <b>Preterm birth* (week)</b> |                                                |                                                         |                    |                                        |                    |                                                  |                       |
| ≤ 37                         | 4,939 (5.4%)                                   | 14 (11.3%)                                              | 2.27 (1.30-3.96)   | 55 (5.7%)                              | 1.08 (0.82-1.42)   | 29 (9.1%)                                        | 1.81 (1.24-2.65)      |
| ≥ 34 < 37                    | 3,506 (3.9%)                                   | 3 (2.4%)                                                | 0.62 (0.20-1.96)   | 41 (4.3%)                              | 1.11 (0.81-1.53)   | 18 (5.7%)                                        | 1.52 (0.94-2.43)      |
| ≥ 28 < 34                    | 1,159 (1.2%)                                   | 6 (4.8%)                                                | 3.99 (1.75-9.13)   | 11 (1.4%)                              | 0.90 (0.50-1.64)   | 11 (5.5%)                                        | 2.84 (1.55-5.22)      |
| ≥ 22 < 28                    | 176 (0.2%)                                     | 5 (4.0%)                                                | 20.09 (8.04-50.22) | 3 (0.3%)                               | 1.56 (0.50-4.89)   | 0 (0%)                                           | Empty                 |
| ≥ 22 < 34                    | 1,335 (1.5%)                                   | 11 (8.9%)                                               | 6.54 (3.51-12.19)  | 14 (1.5%)                              | 0.99 (0.58-1.69)   | 11 (3.5%)                                        | 2.44 (1.33-4.48)      |
| <b>Caesarean section*</b>    |                                                |                                                         |                    |                                        |                    |                                                  |                       |
| Overall                      | 14,542 (16%)                                   | 36 (29%)                                                | 1.83 (1.23-2.72)   | 164 (17%)                              | 0.99 (0.84-1.19)   | 110 (35%)                                        | 2.48 (1.94-3.16)      |
| Acute                        | 9,901 (11%)                                    | 21 (17%)                                                | 1.54 (0.94-2.52)   | 116 (12%)                              | 1.08 (0.88-1.32)   | 62 (20%)                                         | 1.91 (1.44-2.52)      |
| Planned                      | 4,641 (5%)                                     | 15 (12%)                                                | 1.92 (1.11-3.32)   | 48 (5%)                                | 0.85 (0.64-1.14)   | 48 (15%)                                         | 2.58 (1.85-3.60)      |

|    |                       |              |          |                   |           |                   |           |                  |
|----|-----------------------|--------------|----------|-------------------|-----------|-------------------|-----------|------------------|
| 1  |                       |              |          |                   |           |                   |           |                  |
| 2  |                       |              |          |                   |           |                   |           |                  |
| 3  |                       |              |          |                   |           |                   |           |                  |
| 4  |                       |              |          |                   |           |                   |           |                  |
| 5  | IUGR*                 | 3,731 (4.1%) | 6 (4.8%) | 1.27 (0.57-2.85)  | 35 (3.6%) | 0.91 (0.65-1.28)  | 13 (4.1%) | 1.05 (0.60-1.83) |
| 6  |                       |              |          |                   |           |                   |           |                  |
| 7  | PPH*                  | 3,364 (3.7%) | 7 (5.7%) | 1.70 (0.70-3.65)  | 36 (3.7%) | 1.06 (0.76-1.47)  | 15 (4.7%) | 1.40 (0.84-2.35) |
| 8  | Abruption placentae** | 490 (0.5%)   | 1 (0.8%) | 1.41 (0.20-10.15) | 6 (0.6%)  | 1.13 (0.50-2.53)  | 3 (0.9%)  | 1.66 (0.53-5.21) |
| 9  |                       |              |          |                   |           |                   |           |                  |
| 10 | Uterus rupture        | 7 (0.1%)     | 0 (0%)   | Empty             | 2 (0.2%)  | 2.84 (0.39-20.56) | 0 (0%)    | Empty            |

\* adjusted for age and BMI

\*\* adjusted for age

We stratified accordingly to fertility treatment and found an increased risk of extremely preterm birth (OR 25.6 (7.95–82.43)) among women treated for infertility and among spontaneously pregnant women (OR 8.4 (1.08–15.76)). The same was applicable for the pooled group of very and extreme preterm birth where increased risk was found for women with fertility treatment OR 5.6 (2.24–13.85) and spontaneous pregnancy OR 4.5 (1.28–15.76). In women with a fibroid diagnosis code before pregnancy, the risk of preterm birth was not increased in any other groups (Table 3).

Table 3: Results, stratified analyses,

| Fibroids before pregnancy<br>No operation<br>Group 2 |                                   | Fibroids after pregnancy<br>Group 3    |                                   | Operation before pregnancy<br>Group 4  |                                   |
|------------------------------------------------------|-----------------------------------|----------------------------------------|-----------------------------------|----------------------------------------|-----------------------------------|
| Odds ratio(95%CI)                                    | Odds ratio(95%CI)                 | Odds ratio(95%CI)                      | Odds ratio(95%CI)                 | Odds ratio(95%CI)                      | Odds ratio(95%CI)                 |
| No fertility treatment<br>N=75/81,836                | Fertility treatment<br>N=17/5,522 | No fertility treatment<br>N=869/81,836 | Fertility treatment<br>N=94/5,522 | No fertility treatment<br>N=140/81,836 | Fertility treatment<br>N=91/5,522 |

1  
2  
3  
4  
5  
6  
7  
8  
9  
10  
11  
12  
13  
14  
15  
16  
17  
18  
19  
20  
21  
22  
23  
24  
25  
26  
27  
28  
29  
30  
31  
32  
33  
34  
35  
36  
37  
38  
39  
40  
41  
42  
43  
44  
45  
46  
47  
48  
49  
50  
51  
52  
53  
54  
55  
56  
57  
58  
59  
60

| <b>Preterm birth</b> |                                      |                                   |                                      |                                    |                                      |                                    |
|----------------------|--------------------------------------|-----------------------------------|--------------------------------------|------------------------------------|--------------------------------------|------------------------------------|
| <b>(week)</b>        |                                      |                                   |                                      |                                    |                                      |                                    |
| ≤ 37                 | 1.74(0.75-4.02)                      | 1.37(0.39-4.76)                   | 1.04(0.77-1.41)                      | 0.93(0.51-1.72)                    | 1.05(0.49-2.25)                      | 1.06(0.59-1.92)                    |
| ≥ 34 < 37            | 0.37(0.05-2.69)                      | Empty                             | 1.02(0.71-1.47)                      | 1.20(0.62-2.33)                    | 1.24(0.55-2.80)                      | 0.97(0.47-2.02)                    |
| ≥ 28 < 34            | 2.45(0.60-10.02)                     | 3.37(0.77-14.85)                  | 0.94(0.48-1.81)                      | 0.55(0.13-2.25)                    | 0.64(0.09-4.61)                      | 1.47(0.59-3.60)                    |
| ≥ 22 < 28            | 25.60(7.95-82.43)                    | 8.36(1.08-64.50)                  | 2.13(0.68-6.69)                      | Empty                              | Empty                                | Empty                              |
| ≥ 22 < 34            | 5.57(2.24-13.85)                     | 4.5(1.28-15.76)                   | 1.09(0.62-1.93)                      | 0.46(0.17-1.87)                    | 1.09(0.62-1.93)                      | 1.22(0.49-3.04)                    |
|                      | Singleton pregnancy<br>N= 119/89,338 | Multiple pregnancies<br>N=5/1,964 | Singleton pregnancy<br>N= 925/89,338 | Multiple pregnancies<br>N=38/1,964 | Singleton pregnancy<br>N= 292/89,338 | Multiple pregnancies<br>N=25/1,964 |

| <b>Preterm birth</b> |                    |                     |                  |                  |                 |                 |
|----------------------|--------------------|---------------------|------------------|------------------|-----------------|-----------------|
| <b>(week)</b>        |                    |                     |                  |                  |                 |                 |
| ≤ 37                 | 1.90 (0.32-11.45)  | 2.18 (1.17-4.05)    | 0.66 (0.34-1.30) | 1.02 (0.75-1.39) | 1.17(0.53-2.59) | 1.33(0.81-2.16) |
| ≥ 34 < 37            | 0.76 (0.24-2.40)   | Empty               | 0.99 (0.68-1.42) | 0.99 (0.49-2.03) | 1.26(0.68-1.42) | 0.77(0.31-1.95) |
| ≥ 28 < 34            | 3.41 (1.25-9.28)   | 4.40 (0.73-26.48)   | 0.96 (0.50-1.86) | 0.37 (0.09-1.53) | 1.71(0.70-4.15) | 2.09(0.82-5.27) |
| ≥ 22 < 28            | 22.32 (8.18-60.92) | 12.95 (1.41-118.77) | 2.08 (0.66-6.56) | Empty            | Empty           | Empty           |
| ≥ 22 < 34            | 6.11 (2.99-12.51)  | 8.4 (1.41-50.93)    | 1.11 (0.63-1.98) | 0.31 (0.75-1.31) | 1.48(0.61-3.59) | 1.78(0.71-4.50) |



1  
2  
3  
4 We also stratified according to singleton pregnancies. Among singleton pregnant women with a fibroid  
5 diagnosis code before pregnancy, we found an increased risk of very preterm of OR 3.4 (1.25–9.28),  
6  
7 extreme preterm of; OR 22.3 (8.18–60.92), and the pooled group of very and extreme preterm birth of OR  
8  
9 6.1 (2.99–12.51). Apart from that, the risk of preterm birth was not increased in any other groups (Table 3).  
10  
11 For multiple pregnancy women with a fibroid diagnosis code before pregnancy, we found an increased risk  
12  
13 of overall preterm of OR 2.2 (1.17–4.05), very preterm OR 4.4 (0.73–26.48), extreme preterm OR 13.0  
14  
15 (1.41–118.77), and pooled very and extreme preterm birth OR 8.5 (1.41–50.93). Apart from that, the risk of  
16  
17 preterm birth was not increased in any other groups (Table 3). The risk of preterm birth was increased  
18  
19 regardless of stratification according to fertility treatment (with and without) and type of pregnancy  
20  
21 (singleton or multiple) (data not shown).  
22  
23  
24  
25  
26

#### 27 Caesarean section

28  
29  
30 The overall risk of CS was increased in women with a fibroid diagnosis code before pregnancy (group 2), OR  
31  
32 2.2 (1.50–3.21). The same applied after adjusting for age and BMI of OR 1.8 (1.23–2.72). The risk of acute  
33  
34 CS was not increased in the adjusted analyses, OR 1.5 (0.94–2.52). The risk of elective CS was increased, OR  
35  
36 2.6 (1.50–4.41), and the same applied after adjusting for age and BMI, OR 1.9 (1.11–3.32). For the group of  
37  
38 women with an operation code before pregnancy (group 4), the risk of CS was also increased; OR 2.6  
39  
40 (1.85–3.60) for elective CS and OR 1.9 (1.44–2.52) for acute CS. The risk of CS was not increased in women  
41  
42 with a fibroid diagnosis code after pregnancy (group 3) (Table 2).  
43  
44  
45

#### 46 PPH, placental abruption, and IUGR

47  
48  
49 The risk of PPH, placental abruption and IUGR was not increased in women with a fibroid diagnosis code;  
50  
51 PPH OR 1.7 (0.70–3.65), placental abruption OR 1.4 (0.20–10.15), and IUGR OR 1.3 (0.57–2.85) (Table 2).  
52  
53  
54  
55  
56  
57  
58  
59  
60

## Uterine rupture

We found no uterine ruptures in the group with an operation code before pregnancy (N=317, 112 laparoscopic myomectomies, and 205 hysteroscopic myomectomies). Uterine rupture was diagnosed in 67 of the 91,292 (0.1%) women without a fibroid diagnosis code. Two women out of the 963 with a fibroid diagnosis code after pregnancy (0.21%) were diagnosed with uterine rupture, and no women out of 124 (0%) had uterine rupture and a fibroid diagnosis code before pregnancy.

## Discussion

Women with a uterine fibroid diagnosis code had a significantly higher risk of preterm birth in general, extreme preterm birth in particular. The fact that the association persisted through all the analyses, irrespective of the mode of conception, number of foetuses, age, and BMI enhances the robustness and significance of our results.

Previous studies that differed in design in terms of exposure and outcome found weaker associations. A previous systematic review from 2008 reported a cumulative preterm birth rate (before GA 37 weeks) of 16% among women with fibroids corresponding to an OR of 1.5 (1.3–1.7). None of the included studies, however, adjusted for potential confounders such as age and BMI [8]. A recent case series from 2018 reported a preterm birth rate of 28% in women with uterine fibroids. This study did not include a reference group without fibroids, and a calculation of the estimated risk was not possible [19]. All previous studies used different classifications of preterm birth, which further complicates comparison. Three historical cohort studies all showed an increased risk of preterm birth (GA <37 weeks), but they used different categorisation regarding GA. Arisoy et al. reported an OR 4.7 (1.9–11.6) for preterm birth <37, OR 4.3 (2.0–13.9) for preterm birth <34 weeks, decreasing to OR 3.3 (0.8–13.4) for preterm birth <32 weeks [20]. Blitz et al. also categorized preterm birth into groups depending on GA and found OR 1.61 (1.16–2.23) for preterm birth 34–36 weeks, OR 2.99 (1.65–5.40) for preterm birth 32–33 weeks, OR 1.47 (0.59–3.67) for

1  
2  
3  
4 28–31 weeks, and OR 1.81 (1.49–2.19) for 20–27 weeks[21]. In contrast, Lai et al. found an increased risk  
5  
6 of preterm birth with decreasing gestational age; OR 1.70 (1.12–2.58) for 24–34 weeks, OR 1.99 (1.05–3.75)  
7  
8 for 24–28 weeks and OR 2.48 (1.38–4.44) for 20–27 weeks [22]. All three cohort studies included women  
9  
10 who had undergone routine second-trimester obstetrical ultrasound, which was the basis for inclusion into  
11  
12 the exposure or control group. Women in our cohort study were included based on a fibroid diagnosis code  
13  
14 and we assume that many clinical insignificant fibroids with no symptoms were never diagnosed.  
15  
16 Therefore, women in our cohort are likely to be different from women with fibroids diagnosed by routine  
17  
18 ultrasound in pregnancy.  
19  
20  
21  
22

23 In line with previous studies, women with a fibroid diagnosis code had an increased risk of elective  
24  
25 caesarean section. A review from 2016 based on 13 studies reported a cumulative CS frequency of 49%  
26  
27 corresponding to an unadjusted OR of 3.7 (3.5–3.9) [23]. These findings are in line with the clinical  
28  
29 guidelines of elective CS if the uterine fibroids are evaluated to infer a risk of mechanical obstruction or  
30  
31 malpresentation. Further, we found that women with a fibroid diagnosis code intended for vaginal delivery  
32  
33 had the same risk of acute CS as women without a fibroid diagnosis code.  
34  
35  
36

37 With regard to the risk of PPH, placental abruption, or IUGR, we found no differences between groups. In  
38  
39 contrast, a review from 2016, based on historical cohort studies, and a systematic review from 2008,  
40  
41 suggested an increased risk of all three outcomes [23]. However, other studies, which for different reasons  
42  
43 were not included in the systematic review, are consistent with our findings [9, 13, 20, 22, 24].  
44  
45  
46

47 We found no uterine ruptures following laparoscopic myomectomy (N = 112). The risk of uterine rupture  
48  
49 following laparoscopic myomectomy has been compared to the risk following uterine surgery such as CS  
50  
51 [23, 25, 26], and some authors have reported an increased risk of uterine rupture after myomectomy [27].  
52  
53 Based on clinical reasoning it is believed that surgical skills and techniques such as the use of bipolar  
54  
55 diathermy, and timespan from operation to pregnancy are essential factors for the risk of uterine rupture  
56  
57 after myomectomy. Our study did not allow the analysis for these factors. In Denmark, complex  
58  
59  
60

1  
2  
3  
4 laparoscopic myomectomy is preferentially performed by experienced surgeons and six months from  
5  
6 operation to pregnancy is recommended. Both factors are likely to have contributed to the low rate of  
7  
8 uterine rupture found in our study.  
9

10  
11 In a review from 2016, it was suggested that fibroid treatment minimizes the risk of adverse negative  
12  
13 obstetrical outcomes. However, they also concluded that more clinical studies are needed to draw firm  
14  
15 conclusions as findings are still inconsistent [28]. In the present study, the risk of preterm birth decreased  
16  
17 whereas the risk of CS increased after myomectomy compared to the risks among women with untreated  
18  
19 uterine fibroids. Our results contribute to the overall discussion about treatment prior to pregnancy,  
20  
21 however, more studies are required. A Randomized Controlled Trial, which would be optimal for firm  
22  
23 conclusions, is not possible due to ethical considerations. At best, a large cohort study with detailed  
24  
25 exposure and outcome information can give further information.  
26  
27  
28

### 30 Limitations

31  
32  
33 Our results are based on retrospective data, and the number of events was small despite the large size of  
34  
35 the cohort. We found a low prevalence of uterine fibroid diagnosis codes in our study population compared  
36  
37 to previous reports [29]. It might indicate that women participating in DNBC consisted of a selected group  
38  
39 of women [30]. Our results cannot be used as an indicator of prevalence or incidence in the general  
40  
41 population, but it is important to notice, that data are fully valid for analyses of associations[31].  
42  
43  
44

45  
46 Our exposure registration was based on clinical diagnosis coding, which may be incorrect or lacking due to  
47  
48 various work-related distractions and a variable individual interpretation of clinical cases, leading to  
49  
50 exposure misclassification. The low prevalence of uterine fibroids in our study population is likely to be a  
51  
52 result of underreporting. A potential bias will lead towards exposed women being categorized as  
53  
54 unexposed, and hence attenuation of the association between exposure (uterine fibroids) and outcomes  
55  
56 [32]. Since the potential underreporting is independent of the outcome due to the prospective nature of  
57  
58  
59  
60

1  
2  
3  
4 data collection in a cohort study, a potential misclassification could lead to non-differential information  
5  
6 bias.  
7  
8

9  
10 Further, we found that some women had an operation code, but no diagnosis code, substantiating the  
11  
12 hypothesis of risk of exposure misclassification. In Denmark, operation codes are more closely connected to  
13  
14 hospital budgets than clinical diagnosis codes. A detailed validation of data would most likely have solved  
15  
16 discrepancies, but we did not have the possibility to validate the data from the DNPR, and we relied on  
17  
18 previous studies, showing that reproductive gynecological coding in the DNPR is generally valid and suitable  
19  
20 for clinical quality control [33].  
21  
22

23  
24 Risk of misclassification related to the operation codes could have been cleared by post-operative  
25  
26 histological diagnoses. As this data was not available, we minimized the risk by ensuring that none of the  
27  
28 women in our exposure group had a diagnoses code for other uterine pathologies such as adenomyosis or  
29  
30 polyps.  
31  
32

33  
34 The DNBC mainly consist of white women with middle or high social status [30] and since uterine fibroids  
35  
36 have different pathophysiology for e.g. Afro-American and Caucasian woman [34], our results can only  
37  
38 reasonably be applied to the Scandinavian population.  
39  
40

41  
42 A short cervix in early pregnancy has been associated with uterine fibroids and may represent part of the  
43  
44 mechanism behind the risk of preterm birth among women with uterine fibroids [7, 21]. Unfortunately, we  
45  
46 did not have the opportunity to investigate the contribution of cervical length on preterm birth due to the  
47  
48 lack of a specific diagnosis code.  
49  
50  
51  
52  
53  
54  
55  
56  
57  
58  
59  
60

1  
2  
3  
4  
5  
6  
7  
8  
9  
10  
11  
12  
13  
14  
15  
16  
17  
18  
19  
20  
21  
22  
23  
24  
25  
26  
27  
28  
29  
30  
31  
32  
33  
34  
35  
36  
37  
38  
39  
40  
41  
42  
43  
44  
45  
46  
47  
48  
49  
50  
51  
52  
53  
54  
55  
56  
57  
58  
59  
60

## Conclusions

The present study, including 92,696 pregnancies, found a strong association between a uterine fibroid diagnosis and the risk of preterm birth in general and extreme preterm birth in particular. We suggest that future clinical studies focus on the relationship between obstetrical outcomes and fibroids in terms of anatomical location, growth throughout pregnancy, and cervical length.

## Funding

The corresponding author has been financially supported by the University of Southern Denmark, the Region of Southern Denmark, and the Department of Gynecology and Obstetrics at Odense University Hospital, Denmark.

## Data sharing statement

Data are available upon reasonable request.

## Disclosure of Interests

Completed ICMJE disclosure of interest forms are available to view online as supporting information. There are no competing interests.

## Author statement

K.K: Project development, Data management, Data analysis, Manuscript writing/editing

U.S.K: Project development, Data analysis, Manuscript writing

O.M: Project development, Data analysis, Manuscript writing

P.H: Project development, Data analysis, Manuscript writing

P.R: Project development, Data analysis, Manuscript writing

## Figure legends

Fig. 1: Flowchart of the study population

Table 1: Population characteristics

Table 2: Results

Table 3: Results, stratified analyses, adjusted OR

## References

1. Laughlin, S.K., et al., *Prevalence of uterine leiomyomas in the first trimester of pregnancy: an ultrasound-screening study*. *Obstet Gynecol*, 2009. **113**(3): p. 630-5.
2. Statistik, D., 2018.
3. Matthiessen, J. and A. Stockmarr, *Flere overvægtige danske kvinder*. E-artikel fra DTU Fødevareinstituttet, nr. 2., 2015. **E-artikel fra DTU Fødevareinstituttet, nr. 2, 2015**.
4. Blum, M., *Comparative study of serum CAP activity during pregnancy in malformed and normal uterus*. *J Perinat Med*, 1978. **6**(3): p. 165-8.
5. Rice, J.P., H.H. Kay, and B.S. Mahony, *The clinical significance of uterine leiomyomas in pregnancy*. *Am J Obstet Gynecol*, 1989. **160**(5 Pt 1): p. 1212-6.
6. Coronado, G.D., L.M. Marshall, and S.M. Schwartz, *Complications in pregnancy, labor, and delivery with uterine leiomyomas: a population-based study*. *Obstet Gynecol*, 2000. **95**(5): p. 764-9.
7. Shavell, V.I., et al., *Adverse obstetric outcomes associated with sonographically identified large uterine fibroids*. *Fertil Steril*, 2012. **97**(1): p. 107-10.
8. Klatsky, P.C., et al., *Fibroids and reproductive outcomes: a systematic literature review from conception to delivery*. *Am J Obstet Gynecol*, 2008. **198**(4): p. 357-66.
9. Nyflot, L.T., et al., *Risk factors for severe postpartum hemorrhage: a case-control study*. *BMC Pregnancy Childbirth*, 2017. **17**(1): p. 17.
10. Ouyang, D.W., K.E. Economy, and E.R. Norwitz, *Obstetric complications of fibroids*. *Obstet Gynecol Clin North Am*, 2006. **33**(1): p. 153-69.
11. Olive, D.L. and E.A. Pritts, *Fibroids and reproduction*. *Semin Reprod Med*, 2010. **28**(3): p. 218-27.
12. Cook, H., et al., *The impact of uterine leiomyomas on reproductive outcomes*. *Minerva Ginecol*, 2010. **62**(3): p. 225-36.
13. Martin, J., et al., *Obstetrical Outcomes of Ultrasound Identified Uterine Fibroids in Pregnancy*. *Am J Perinatol*, 2016. **33**(12): p. 1218-22.
14. Lam, S.J., S. Best, and S. Kumar, *The impact of fibroid characteristics on pregnancy outcome*. *Am J Obstet Gynecol*, 2014. **211**(4): p. 395.e1-5.
15. Pritts, E.A., W.H. Parker, and D.L. Olive, *Fibroids and infertility: an updated systematic review of the evidence*. *Fertil Steril*, 2009. **91**(4): p. 1215-23.

1  
2  
3  
4  
5  
6  
7  
8  
9  
10  
11  
12  
13  
14  
15  
16  
17  
18  
19  
20  
21  
22  
23  
24  
25  
26  
27  
28  
29  
30  
31  
32  
33  
34  
35  
36  
37  
38  
39  
40  
41  
42  
43  
44  
45  
46  
47  
48  
49  
50  
51  
52  
53  
54  
55  
56  
57  
58  
59  
60

16. Olsen, S.F., et al., *The Danish National Birth Cohort--its background, structure and aim*. Scand J Public Health, 2001. **29**(4): p. 300-7.
17. de Onis, M. and J.P. Habicht, *Anthropometric reference data for international use: recommendations from a World Health Organization Expert Committee*. Am J Clin Nutr, 1996. **64**(4): p. 650-8.
18. Textor, J., J. Hardt, and S. Knuppel, *DAGitty: a graphical tool for analyzing causal diagrams*. Epidemiology, 2011. **22**(5): p. 745.
19. Saleh, H.S., et al., *Does Uterine Fibroid Adversely Affect Obstetric Outcome of Pregnancy?* Biomed Res Int, 2018. **2018**: p. 8367068.
20. Arisoy, R., et al., *Obstetric outcomes of intramural leiomyomas in pregnancy*. Clin Exp Obstet Gynecol, 2016. **43**(6): p. 844-848.
21. Blitz, M.J., et al., *Uterine fibroids at routine second-trimester ultrasound survey and risk of sonographic short cervix*. J Matern Fetal Neonatal Med, 2016. **29**(21): p. 3454-60.
22. Lai, J., et al., *Neonatal outcomes in women with sonographically identified uterine leiomyomata*. J Matern Fetal Neonatal Med, 2012. **25**(6): p. 710-3.
23. Ezzedine, D. and E.R. Norwitz, *Are Women With Uterine Fibroids at Increased Risk for Adverse Pregnancy Outcome?* Clin Obstet Gynecol, 2016. **59**(1): p. 119-27.
24. Ciavattini, A., et al., *Number and size of uterine fibroids and obstetric outcomes*. J Matern Fetal Neonatal Med, 2015. **28**(4): p. 484-8.
25. Pistofidis, G., et al., *Report of 7 uterine rupture cases after laparoscopic myomectomy: update of the literature*. J Minim Invasive Gynecol, 2012. **19**(6): p. 762-7.
26. Milazzo, G.N., et al., *Myoma and myomectomy: Poor evidence concern in pregnancy*. J Obstet Gynaecol Res, 2017. **43**(12): p. 1789-1804.
27. Kim, M.S., et al., *Obstetric outcomes after uterine myomectomy: Laparoscopic versus laparotomic approach*. Obstet Gynecol Sci, 2013. **56**(6): p. 375-81.
28. Parazzini, F., L. Tozzi, and S. Bianchi, *Pregnancy outcome and uterine fibroids*. Best Pract Res Clin Obstet Gynaecol, 2016. **34**: p. 74-84.
29. Baird, D.D., et al., *High cumulative incidence of uterine leiomyoma in black and white women: ultrasound evidence*. Am J Obstet Gynecol, 2003. **188**(1): p. 100-7.
30. Jacobsen, T.N., E.A. Nohr, and M. Frydenberg, *Selection by socioeconomic factors into the Danish National Birth Cohort*. Eur J Epidemiol, 2010. **25**(5): p. 349-55.
31. Nohr, E.A., et al., *Does low participation in cohort studies induce bias?* Epidemiology, 2006. **17**(4): p. 413-8.
32. Kesmodel, U.S., *Information bias in epidemiological studies with a special focus on obstetrics and gynecology*. Acta Obstet Gynecol Scand, 2018. **97**(4): p. 417-423.
33. Lidegaard, O., C.H. Vestergaard, and M.S. Hammerum, *[Quality monitoring based on data from the Danish National Patient Registry]*. Ugeskr Laeger, 2009. **171**(6): p. 412-5.
34. Parazzini, F., et al., *Epidemiologic characteristics of women with uterine fibroids: a case-control study*. Obstet Gynecol, 1988. **72**(6): p. 853-7.



Figure 1: Flowchart of the study population

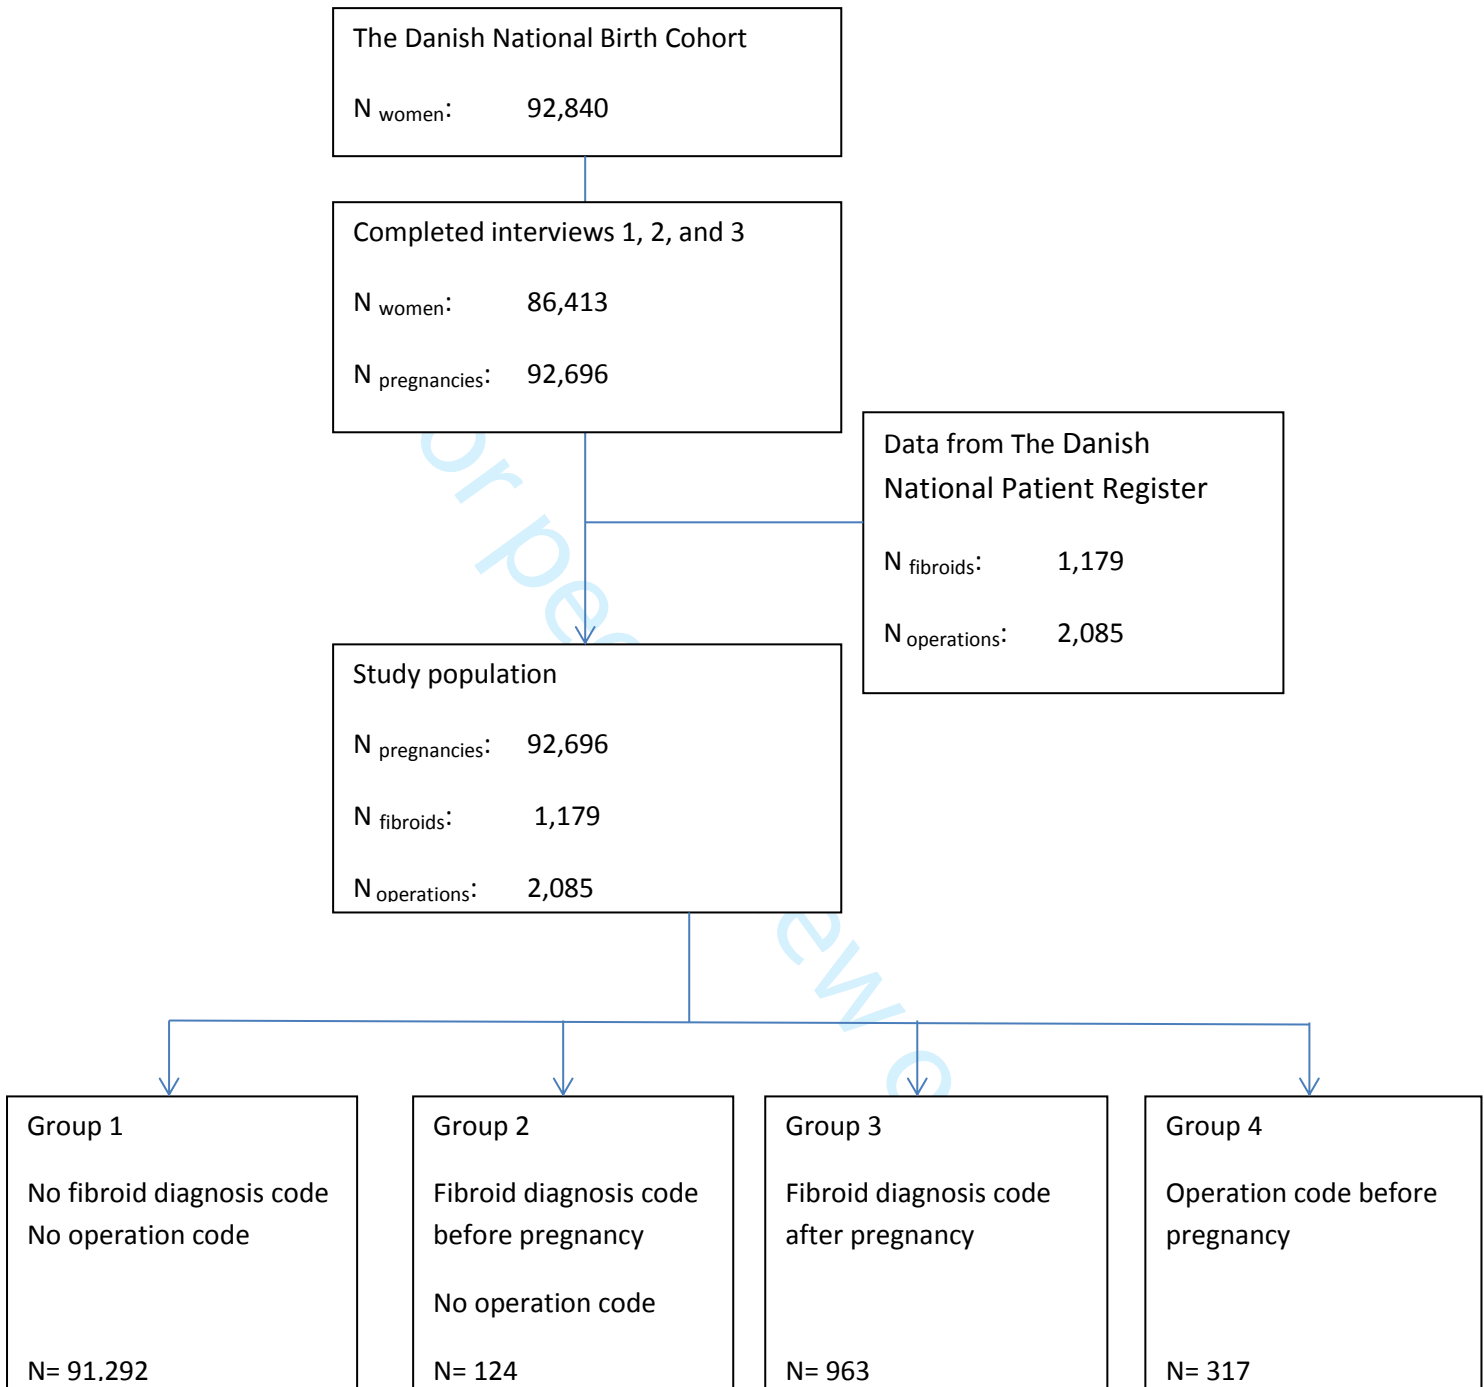

1  
2  
3  
4  
5  
6  
7  
8  
9  
10  
11  
12  
13  
14  
15  
16  
17  
18  
19  
20  
21  
22  
23  
24  
25  
26  
27  
28  
29  
30  
31  
32  
33  
34  
35  
36  
37  
38  
39  
40  
41  
42  
43  
44  
45  
46  
47  
48  
49  
50  
51  
52  
53  
54  
55  
56  
57  
58  
59  
60

For peer review only

STROBE Statement—Checklist of items that should be included in reports of *cohort studies*

|                                            | Item No | Recommendation                                                                                                                                                                                                                                                                                                         |
|--------------------------------------------|---------|------------------------------------------------------------------------------------------------------------------------------------------------------------------------------------------------------------------------------------------------------------------------------------------------------------------------|
| <b>Title and abstract</b><br>(Page 1)      | 1       | (a) Indicate the study's design with a commonly used term in the title or the abstract<br>(b) Provide in the abstract an informative and balanced summary of what was done and what was found                                                                                                                          |
| <b>Introduction</b>                        |         |                                                                                                                                                                                                                                                                                                                        |
| Background/rationale<br>(Page 3)           | 2       | Explain the scientific background and rationale for the investigation being reported                                                                                                                                                                                                                                   |
| Objectives<br>(Page 3)                     | 3       | State specific objectives, including any prespecified hypotheses                                                                                                                                                                                                                                                       |
| <b>Methods</b>                             |         |                                                                                                                                                                                                                                                                                                                        |
| Study design<br>(Page 4)                   | 4       | Present key elements of study design early in the paper                                                                                                                                                                                                                                                                |
| Setting<br>(Page 4)                        | 5       | Describe the setting, locations, and relevant dates, including periods of recruitment, exposure, follow-up, and data collection                                                                                                                                                                                        |
| Participants<br>(Page 4)                   | 6       | (a) Give the eligibility criteria, and the sources and methods of selection of participants. Describe methods of follow-up<br>(b) For matched studies, give matching criteria and number of exposed and unexposed                                                                                                      |
| Variables<br>(Page 5+6)                    | 7       | Clearly define all outcomes, exposures, predictors, potential confounders, and effect modifiers. Give diagnostic criteria, if applicable                                                                                                                                                                               |
| Data sources/<br>measurement<br>(Page 5+6) | 8*      | For each variable of interest, give sources of data and details of methods of assessment (measurement). Describe comparability of assessment methods if there is more than one group                                                                                                                                   |
| Bias<br>(Page 7)                           | 9       | Describe any efforts to address potential sources of bias                                                                                                                                                                                                                                                              |
| Study size                                 | 10      | Explain how the study size was arrived at                                                                                                                                                                                                                                                                              |
| Quantitative variables<br>(Page 6)         | 11      | Explain how quantitative variables were handled in the analyses. If applicable, describe which groupings were chosen and why                                                                                                                                                                                           |
| Statistical methods<br>(Page 6+7)          | 12      | (a) Describe all statistical methods, including those used to control for confounding<br>(b) Describe any methods used to examine subgroups and interactions<br>(c) Explain how missing data were addressed<br>(d) If applicable, explain how loss to follow-up was addressed<br>(e) Describe any sensitivity analyses |
| <b>Results</b>                             |         |                                                                                                                                                                                                                                                                                                                        |
| Participants<br>(Figure 1)                 | 13*     | (a) Report numbers of individuals at each stage of study—eg numbers potentially eligible, examined for eligibility, confirmed eligible, included in the study, completing follow-up, and analysed<br>(b) Give reasons for non-participation at each stage<br>(c) Consider use of a flow diagram                        |
| Descriptive data<br>(Table 1)<br>(Page 6)  | 14*     | (a) Give characteristics of study participants (eg demographic, clinical, social) and information on exposures and potential confounders<br>(b) Indicate number of participants with missing data for each variable of interest<br>(c) Summarise follow-up time (eg, average and total amount)                         |
| Outcome data                               | 15*     | Report numbers of outcome events or summary measures over time                                                                                                                                                                                                                                                         |
| Main results<br>(Page 11-16)               | 16      | (a) Give unadjusted estimates and, if applicable, confounder-adjusted estimates and their precision (eg, 95% confidence interval). Make clear which confounders were                                                                                                                                                   |

|    |                          |                                                                                           |
|----|--------------------------|-------------------------------------------------------------------------------------------|
| 1  |                          | adjusted for and why they were included                                                   |
| 2  |                          | (b) Report category boundaries when continuous variables were categorized                 |
| 3  |                          | (c) If relevant, consider translating estimates of relative risk into absolute risk for a |
| 4  |                          | meaningful time period                                                                    |
| 5  |                          |                                                                                           |
| 6  | Other analyses           | 17 Report other analyses done—eg analyses of subgroups and interactions, and              |
| 7  |                          | sensitivity analyses                                                                      |
| 8  |                          |                                                                                           |
| 9  | <b>Discussion</b>        |                                                                                           |
| 10 | Key results              | 18 Summarise key results with reference to study objectives                               |
| 11 | (Page 16)                |                                                                                           |
| 12 |                          |                                                                                           |
| 13 | Limitations              | 19 Discuss limitations of the study, taking into account sources of potential bias or     |
| 14 | (Page 18)                | imprecision. Discuss both direction and magnitude of any potential bias                   |
| 15 |                          |                                                                                           |
| 16 | Interpretation           | 20 Give a cautious overall interpretation of results considering objectives, limitations, |
| 17 | (Page 18-19)             | multiplicity of analyses, results from similar studies, and other relevant evidence       |
| 18 |                          |                                                                                           |
| 19 | Generalisability         | 21 Discuss the generalisability (external validity) of the study results                  |
| 20 | (Page 18-19)             |                                                                                           |
| 21 | <b>Other information</b> |                                                                                           |
| 22 | Funding                  | 22 Give the source of funding and the role of the funders for the present study and, if   |
| 23 | (Page 19)                | applicable, for the original study on which the present article is based                  |
| 24 |                          |                                                                                           |

\*Give information separately for exposed and unexposed groups.

**Note:** An Explanation and Elaboration article discusses each checklist item and gives methodological background and published examples of transparent reporting. The STROBE checklist is best used in conjunction with this article (freely available on the Web sites of PLoS Medicine at <http://www.plosmedicine.org/>, Annals of Internal Medicine at <http://www.annals.org/>, and Epidemiology at <http://www.epidem.com/>). Information on the STROBE Initiative is available at <http://www.strobe-statement.org>.
